# Supplementary material
Source: ML conference proceedings conference paper supplement (https://openreview.net/forum?id=c3MWGN_cTf)
Supplement: supplementary_material [file attachment]

# POLICY OPTIMIZATION IN ZERO-SUM MARKOV GAMES: FICTITIOUS SELF-PLAY PROVABLY ATTAINS NASH EQUILIBRIA

**Anonymous authors**

Paper under double-blind review

## ABSTRACT

Fictitious Self-Play (FSP) has achieved significant empirical success in solving extensive-form games. However, from a theoretical perspective, it remains unknown whether FSP is guaranteed to converge to Nash equilibria in Markov games. As an initial attempt, we propose an FSP algorithm for two-player zero-sum Markov games, dubbed as smooth FSP, where both agents adopt an entropy-regularized policy optimization method against each other. Smooth FSP builds upon a connection between smooth fictitious play and the policy optimization framework. Specifically, in each iteration, each player infers the policy of the opponent implicitly via policy evaluation and improves its current policy by taking the smoothed best-response via a proximal policy optimization (PPO) step. Moreover, to tame the non-stationarity caused by the opponent, we propose to incorporate entropy regularization in PPO for algorithmic stability. When both players adopt smooth FSP simultaneously, i.e., with self-play, in a class of games with Lipschitz continuous transition and reward, we prove that the sequence of joint policies converges to a neighborhood of a Nash equilibrium at a sublinear  $\tilde{O}(1/T)$  rate, where  $T$  is the number of iterations. To our best knowledge, we establish the first finite-time convergence guarantee for FSP-type algorithms in zero-sum Markov games.

## 1 INTRODUCTION

Multi-agent reinforcement learning (MARL) (Bu et al., 2008; Sutton & Barto, 2018) has achieved great empirical success, e.g., in playing the game of Go (Silver et al., 2016; 2017), Dota 2 (Berner et al., 2019), and StarCraft 2 (Vinyals et al., 2019), which are all driven by policy optimization algorithms which iteratively update the policies that are parameterized using deep neural networks. Empirically, the popularity of policy optimization algorithms for MARL is attributed to the observations that they usually converges faster than value-based methods that iteratively update the value functions (Mnih et al., 2016; O’Donoghue et al., 2016).

Compared with their empirical success, the theoretical aspect of policy optimization algorithms in MARL setting (Littman, 1994; Hu & Wellman, 2003; Conitzer & Sandholm, 2007; Pérolat et al., 2016; Zhang et al., 2018) remains less understood. Although convergence guarantees for various policy optimization algorithms have been established under the single-agent RL setting (Sutton et al., 2000; Konda & Tsitsiklis, 2000; Kakade, 2002; Agarwal et al., 2019; Wang et al., 2019), extending those theoretical guarantees to arguably one of the simplest settings of MARL, two-player zero-sum Markov game, suffers from challenges in the following two aspects. First, in such a Markov game, each agent interact with the opponent as well as the environment. Seen from the perspective of each agent, it belongs to an environment that is altered by the actions of the opponent. As a result, due to the existence of an opponent, the policy optimization problem of each agent has a time-varying objective function, which is in stark contrast with the value-based methods such as value-iteration Shapley (1953); Littman (1994), where there is a central controller which specifies the policies of both players. When the joint policy of both players are considered, the problem of solving the optimal value function corresponds to finding the fixed point of the Bellman operator, which is defined independently of the policy of the players. Second, when viewing the policy optimization in zero-sum Markov game as an optimization problem for both players together, although we have

a fixed objective function, the problem is minimax optimization with a non-convex non-concave objective. Even for classical optimization, such a kind of optimization problem remains less understood (Cherukuri et al., 2017; Rafique et al., 2018; Daskalakis & Panageas, 2018; Mertikopoulos et al., 2018). It is observed that first-order methods such as gradient descent might fail to converge (Balduzzi et al., 2018; Mazumdar & Ratliff, 2018).

As an initial step to study policy optimization for MARL, we propose a novel policy optimization algorithm for any player of a multi-player Markov game, which is dubbed as smooth fictitious self-play (FSP). Specifically, when a player adopts smooth FSP, in each iteration, it first solves a policy evaluation problem that estimates the value function associate with the current joint policy of all players. Then it update its own policy via an entropy-regularized proximal policy optimization (PPO) Schulman et al. (2017) step, where the update direction is obtained from the estimated value function. This algorithm can be viewed as an extension of the fictitious play (FP) algorithm that is designed for normal-form games (Von Neumann & Morgenstern, 2007; Shapley, 1953) and extensive-form games (Heinrich et al., 2015; Perolat et al., 2018) to Markov-games. FP is a general algorithmic framework for solving games where an agent first infer the policy of the opponents and then adopt a policy that best respond to the inferred opponents. When viewing our algorithm as a FP method, instead of estimating the policies of the opponents directly, the agent infers the opponent implicitly by estimating the value function. Besides, policy update corresponds to a smoothed best-response policy Swenson & Poor (2019) based on the inferred value function.

To examine the theoretical merits of the proposed algorithm, we focus on two-player zero-sum Markov games and let both players follow smooth FSP, i.e., with self-play. Moreover, we restrict to a class of Lipschitz games (Radanovic et al., 2019) where the impact of each player’s policy change on the environment is Lipschitz continuous with respect to the magnitude of policy change. For such a Markov game, we tackle the challenge of non-stationarity by imposing entropy regularization which brings algorithmic stability. In addition, to establish convergence to Nash equilibrium, we explicitly characterize the geometry of the policy optimization problem from a functional perspective. Specifically, we prove that the objective function, as a bivariate function of the two players’ policies, despite being non-convex and non-concave, satisfies a one-point strong monotonicity condition (Facchinei & Pang, 2007) at a Nash equilibrium. Thanks to such benign geometry, we prove that smooth FSP converges to a neighborhood of a Nash equilibrium at a sublinear  $\tilde{O}(1/T)$  rate, where  $T$  is the number of policy iterations and  $\tilde{O}$  hides logarithmic factors. Moreover, as a byproduct of our analysis, if any of the two players deviates from the proposed algorithm, it is shown the other player that follows smooth FSP exploits such deviation by finding the best-response policy at a same sublinear rate. Such a Hannan consistency property exhibited in our algorithm is related to Hennes et al. (2020), which focus on normal-form games. Thus, our results also serve as a first step towards connecting regret between minimization in normal-form/extensive-form games and Markov games.

**Contribution.** Our contribution is two-fold. First, we propose a novel policy optimization algorithm for Markov games, which can be viewed as a generalization of FP. Second, when applied to a class of two-player zero-sum Markov games satisfying a Lipschitz regularity condition, our algorithm provably enjoys global convergence to a neighborhood of a Nash equilibrium at a sublinear rate. To the best of our knowledge, we propose the first provable FSP-type algorithm with finite time convergence guarantee for zero-sum Markov games.

**Related Work.** There is a large body of literature on the value-based methods to zero-sum Markov games (Lagoudakis & Parr, 2012; Pérolat et al., 2016; Zhang et al., 2018; Zou et al., 2019). More recently, Perolat et al. (2018) prove that actor-critic fictitious play asymptotically converges to the Nash equilibrium, while our work provides finite time convergence guarantee to a neighborhood of a Nash equilibrium. In addition, Zhang et al. (2020) study the sample complexity of planning algorithm in the model-based MARL setting as opposed to the model-free setting with function approximation in this paper.

Closely related to smooth FSP proposed in this paper, there is a line of work in best-response algorithms (Heinrich et al., 2015; Heinrich & Silver, 2016), which have also shown great empirical performances (Dudziak, 2006; Xiao et al., 2013; Kawamura et al., 2017). However, they are only applicable to extensive-form games and not directly applicable to stochastic games. Also, our smooth FSP is related to Swenson & Poor (2019), which focus on the potential games. It does not enforce entropy-regularization and only provides asymptotic convergence guarantee to a neighborhood of the

Nash equilibrium for smooth fictitious play in multi-player two-action potential games. Moreover, our work also falls into the realm of regularizing and smoothing techniques in reinforcement learning (Dai et al., 2017; Geist et al., 2019; Shani et al., 2019; Cen et al., 2020), which focus on the single-agent setting.

## 2 BACKGROUND

In this section, we briefly introduce the general setting of reinforcement learning for two-player zero-sum Markov games.

**Zero-Sum Markov Games.** We consider the two-player zero-sum Markov game  $(\mathcal{S}, \mathcal{A}^1, \mathcal{A}^2, \mathcal{P}, r, \gamma)$ , where  $\mathcal{S} \subset \mathbb{R}^d$  is a compact state space,  $\mathcal{A}^1$  and  $\mathcal{A}^2$  are finite action spaces of Player 1 and Player 2, respectively,  $\mathcal{P} : \mathcal{S} \times \mathcal{S} \times \mathcal{A}^1 \times \mathcal{A}^2 \rightarrow [0, 1]$  is the Markov transition kernel,  $r : \mathcal{S} \times \mathcal{A}^1 \times \mathcal{A}^2 \rightarrow [-1, 1]$  is the reward function of Player 1, which implies that the reward function of Player 2 is  $-r$ , and  $\gamma \in (0, 1)$  is the discount factor. Let  $r_1 = r$  and  $r_2 = -r$  be the reward functions of Player 1 and Player 2, respectively. For notational simplicity, throughout this paper, we write Player  $-i$  as Player  $i$ 's opponent, where  $i \in \{1, 2\}$ . In the rest of this paper, we omit  $i \in \{1, 2\}$  where it is clear from the context. Also, we denote by  $\mathbb{E}_{\pi^i, \pi^{-i}}[\cdot]$  the expectation over the trajectory induced by the policy pair  $[\pi^i; \pi^{-i}]$ .

Given a policy  $\pi^{-i} : \mathcal{A}^{-i} \times \mathcal{S} \rightarrow [0, 1]$  of Player  $-i$ , the performance of a policy  $\pi^i : \mathcal{A}^i \times \mathcal{S} \rightarrow [0, 1]$  of Player  $i$  is evaluated by its state-value function ( $V_i$ -function)  $V_i^{\pi^i, \pi^{-i}} : \mathcal{S} \rightarrow \mathbb{R}$ , which is defined as

$$V_i^{\pi^i, \pi^{-i}}(s) = \mathbb{E}_{\pi^i, \pi^{-i}} \left[ \sum_{t=0}^{\infty} \gamma^t \cdot r_i(s_t, a_t^i, a_t^{-i}) \mid s_0 = s \right]. \quad (2.1)$$

Correspondingly, the performance of a policy  $\pi^i : \mathcal{A}^i \times \mathcal{S} \rightarrow [0, 1]$  of Player  $i$  is evaluated by its action-value function ( $Q_i$ -function)  $Q_i^{\pi^i, \pi^{-i}} : \mathcal{S} \times \mathcal{A}^i \times \mathcal{A}^{-i} \rightarrow \mathbb{R}$ , which is defined by the following Bellman equation,

$$Q_i^{\pi^i, \pi^{-i}}(s, a^i, a^{-i}) = r_i(s, a^i, a^{-i}) + \gamma \cdot \mathbb{E}_{s' \sim \mathcal{P}(\cdot \mid s, a^i, a^{-i})} [V_i^{\pi^i, \pi^{-i}}(s')].$$

We denote by  $\nu_{\pi^i, \pi^{-i}}(s)$  and  $\sigma_{\pi^i, \pi^{-i}}(s, a^i, a^{-i}) = \pi^i(a^i \mid s) \cdot \pi^{-i}(a^{-i} \mid s) \cdot \nu_{\pi^i, \pi^{-i}}(s)$  the stationary state distribution and the stationary state-action distribution associated with the policy pair  $[\pi^i; \pi^{-i}]$ , respectively. Correspondingly, we denote by  $\mathbb{E}_{\sigma_{\pi^i, \pi^{-i}}}[\cdot]$  and  $\mathbb{E}_{\nu_{\pi^i, \pi^{-i}}}[\cdot]$  the expectations  $\mathbb{E}_{(s, a^i, a^{-i}) \sim \sigma_{\pi^i, \pi^{-i}}}[\cdot]$  and  $\mathbb{E}_{s \sim \nu_{\pi^i, \pi^{-i}}}[\cdot]$ , respectively. Throughout this paper, we denote by  $\langle \cdot, \cdot \rangle$  the inner product between vectors.

Let  $[\pi_*^1, \pi_*^2]$  be a Nash equilibrium of the two-player zero-sum Markov game  $(\mathcal{S}, \mathcal{A}^1, \mathcal{A}^2, \mathcal{P}, r, \gamma)$ , which exists (Shapley, 1953) and satisfies

$$\mathcal{J}(\pi^1, \pi_*^2) \leq \mathcal{J}(\pi_*^1, \pi_*^2) \leq \mathcal{J}(\pi_*^1, \pi^2)$$

for all policy pairs  $[\pi^1; \pi^2]$ . Here we define the performance function as

$$\mathcal{J}(\pi^1, \pi^2) = \mathbb{E}_{\nu^*} [V_1^{\pi^1, \pi^2}(s)], \quad (2.2)$$

where  $\nu^*$  is the stationary distribution  $\sigma_{\pi_*^1, \pi_*^2}$ .

**Regularized Markov Games.** Based on the definition of the two-player zero-sum Markov game  $(\mathcal{S}, \mathcal{A}^1, \mathcal{A}^2, \mathcal{P}, r, \gamma)$ , we define its entropy-regularized counterpart  $(\mathcal{S}, \mathcal{A}^1, \mathcal{A}^2, \mathcal{P}, r, \gamma, \lambda_1, \lambda_2)$ , where  $\lambda_1, \lambda_2 \geq 0$  are the regularization parameters. Specifically,  $(\mathcal{S}, \mathcal{A}^1, \mathcal{A}^2, \mathcal{P}, r, \gamma, \lambda_1, \lambda_2)$  is defined as the two-player general-sum Markov game with the reward function of Player  $i$  replaced by its entropy-regularized counterpart  $r_{(i)}^{\pi^i, \pi^{-i}} : \mathcal{S} \times \mathcal{A}^i \times \mathcal{A}^{-i} \rightarrow \mathbb{R}$ , which is defined as

$$r_{(i)}^{\pi^i, \pi^{-i}}(s, a^i, a^{-i}) = r_i(s, a^i, a^{-i}) - \lambda_i \cdot \log \pi^i(a^i \mid s). \quad (2.3)$$

With a slight abuse of notation, we write

$$\begin{aligned} r_i^{\pi^i, \pi^{-i}}(s) &= \mathbb{E}_{\pi^i, \pi^{-i}} [r_i(s, a^i, a^{-i})], \\ r_{(i)}^{\pi^i, \pi^{-i}}(s) &= \mathbb{E}_{\pi^i, \pi^{-i}} [r_{(i)}^{\pi^i, \pi^{-i}}(s, a^i, a^{-i})] = r_i^{\pi^i, \pi^{-i}}(s) + \lambda_i \cdot H(\pi^i(\cdot \mid s)) \end{aligned}$$

as the state-reward function and the entropy-regularized state-reward function, respectively. Here  $H(\pi^i(\cdot | s)) = -\sum_{a^i \in \mathcal{A}^i} \pi^i(a^i | s) \cdot \log \pi^i(a^i | s)$  is the Shannon entropy. For Player  $i$ , the entropy-regularized state-value function ( $V_{(i)}$ -function)  $V_{(i)}^{\pi^i, \pi^{-i}} : \mathcal{S} \rightarrow \mathbb{R}$  and the entropy-regularized action-value function ( $Q_{(i)}$ -function)  $Q_{(i)}^{\pi^i, \pi^{-i}} : \mathcal{S} \times \mathcal{A}^i \times \mathcal{A}^{-i} \rightarrow \mathbb{R}$  are defined as

$$V_{(i)}^{\pi^i, \pi^{-i}}(s) = \mathbb{E}_{\pi^i, \pi^{-i}} \left[ \sum_{t=0}^{\infty} \gamma^t \cdot r_{(i)}^{\pi^i, \pi^{-i}}(s_t, a_t^i, a_t^{-i}) \mid s_0 = s \right], \quad (2.4)$$

$$Q_{(i)}^{\pi^i, \pi^{-i}}(s, a^i, a^{-i}) = r_i(s, a^i, a^{-i}) + \gamma \cdot \mathbb{E}_{s' \sim \mathcal{P}(\cdot | s, a^i, a^{-i})} [V_{(i)}^{\pi^i, \pi^{-i}}(s')], \quad (2.5)$$

respectively. By the definition of  $r_{(i)}^{\pi^i, \pi^{-i}}$  in (2.3), we have that, for all policy pairs  $[\pi^i; \pi^{-i}]$  and  $s \in \mathcal{S}$ ,

$$\left| \mathbb{E}_{\pi^i, \pi^{-i}} [r_{(i)}^{\pi^i, \pi^{-i}}(s, a^i, a^{-i})] \right| \leq 1 + \lambda_i \cdot \log |\mathcal{A}^i|,$$

which, by (2.4) and (2.5) implies that, for all policy pairs  $[\pi^i; \pi^{-i}]$  and  $(s, a^i, a^{-i}) \in \mathcal{S} \times \mathcal{A}^i \times \mathcal{A}^{-i}$ ,

$$|V_{(i)}^{\pi^i, \pi^{-i}}(s)| \leq V_{(i)}^{\max} = \frac{1 + \lambda_i \cdot \log |\mathcal{A}^i|}{1 - \gamma}, \quad (2.6)$$

$$|Q_{(i)}^{\pi^i, \pi^{-i}}(s, a^i, a^{-i})| \leq Q_{(i)}^{\max} = 1 + \frac{\gamma \cdot (1 + \lambda_i \cdot \log |\mathcal{A}^i|)}{1 - \gamma}. \quad (2.7)$$

### 3 FICTITIOUS SELF-PLAY FOR ZERO-SUM MARKOV GAMES

In this section, we introduce smooth fictitious self-play (FSP) for two-player zero-sum Markov games.

#### 3.1 FSP: FROM MATRIX GAMES TO MARKOV GAMES

FSP is an algorithmic framework for finding the Nash equilibria of games. It consists of two building blocks: (I) inferring the opponent's policy by playing against each other, namely fictitious play, and (II) improving the two players' policies with symmetric updating rules, namely self-play. Specifically, Player  $i$  best responds to a mixed policy of Player  $-i$ , which is a weighted average of Player  $-i$ 's historical policies. Here playing a mixed policy  $\bar{\pi}^{-i} = \alpha \cdot \pi^{-i} + (1 - \alpha) \cdot \pi^{-i'}$  means that, at the beginning of the game, the player chooses to play the policy  $\pi^{-i}$  with probability  $\alpha$  and play the policy  $\pi^{-i'}$  with probability  $1 - \alpha$ .

FSP is originally developed for normal-form games (Von Neumann & Morgenstern, 2007; Shapley, 1953) and extensive-form games (Heinrich et al., 2015; Heinrich & Silver, 2016). In (entropy-regularized) two-player zero-sum matrix games, which are the special cases of (entropy-regularized) two-player zero-sum Markov games with  $|\mathcal{S}| = 1$  and no state transition, mixing two policies  $\pi^{-i}$  and  $\pi^{-i'}$  with probabilities  $\alpha$  and  $1 - \alpha$ , respectively, is equivalent to averaging the corresponding  $Q_i$ -functions, i.e.,

$$Q_i^{\pi^i, \alpha \cdot \pi^{-i} + (1 - \alpha) \cdot \pi^{-i'}} = \alpha \cdot Q_i^{\pi^i, \pi^{-i}} + (1 - \alpha) \cdot Q_i^{\pi^i, \pi^{-i'}}.$$

In other words, in a two-player zero-sum matrix game, Player  $i$  is equivalently best responding to a weighted average of the historical  $Q_i$ -functions by taking the corresponding greedy action. To generalize FSP to the two-player zero-sum Markov game  $(\mathcal{S}, \mathcal{A}^1, \mathcal{A}^2, \mathcal{P}, r, \gamma)$ , we propose to let Player  $i$  best respond to the following weighted average of the historical marginalized  $Q_{(i)}$ -functions at the  $t$ -th iteration,

$$\bar{Q}_{t+1, (i)}(s, a^i) = (1 - \bar{\alpha}_{t, (i)}) \cdot \bar{Q}_{t, (i)}(s, a^i) + \bar{\alpha}_{t, (i)} \cdot \tilde{Q}_{(i)}^{\pi^i, \pi_t^{-i}}(s, a^i), \quad (3.1)$$

where  $\bar{\alpha}_{t, (i)} \in [0, 1]$  is the mixing rate. Here the marginalized  $Q_{(i)}$ -function  $\tilde{Q}_{(i)}^{\pi^i, \pi_t^{-i}}(s, a^i)$  is defined as

$$\tilde{Q}_{(i)}^{\pi^i, \pi_t^{-i}}(s, a^i) = \mathbb{E}_{\pi_t^{-i}} [Q_{(i)}^{\pi^i, \pi_t^{-i}}(s, a^i, a^{-i})]. \quad (3.2)$$

Recursively applying the symmetric updating rule in (3.1), we obtain

$$\bar{Q}_{t+1,(i)}(s, a^i) = \sum_{\tau=0}^t \left\{ \left[ \bar{\alpha}_{\tau,(i)} \cdot \prod_{k=\tau+1}^t (1 - \bar{\alpha}_{k,(i)}) \right] \cdot \tilde{Q}_{(i)}^{\pi_{\tau}^i, \pi_{\tau}^{-i}}(s, a^i) \right\},$$

which is the weighted average of the historical marginalized  $Q_{(i)}$ -functions. Here we use the convention that  $\prod_{k=t+1}^t (1 - \bar{\alpha}_{k,(i)}) = 1$ . Correspondingly, (3.1) induces the following symmetric policy updating rule,

$$\pi_{t+1}^{i, \text{best}}(a^i | s) = \mathbb{1} \left( a^i = \underset{a^{i'} \in \mathcal{A}^i}{\operatorname{argmax}} \{ \bar{Q}_{t+1,(i)}(s, a^{i'}) \} \right), \quad (3.3)$$

where the obtained policy  $\pi_{t+1}^{i, \text{best}}$  best responds to  $\bar{Q}_{t+1,(i)}$  defined in (3.1) by taking the corresponding greedy action.

### 3.2 MARKOV GAMES: FROM FSP TO SMOOTH FSP

FSP is only known to converge asymptotically even in two-player zero-sum matrix games (Robinson, 1951). Instead, we consider smooth FSP, which uses the following smoothed best-response,

$$\pi_{t+1}^i(a^i | s) \propto \exp \{ \mathcal{E}_{t+1,(i)}(s, a^i) \}. \quad (3.4)$$

Here the ideal energy function  $\mathcal{E}_{t+1,(i)}(s, a^i) = \kappa_{t+1,(i)} \cdot \bar{Q}_{t+1,(i)}(s, a^i)$  is proportional to the weighted average of the historical marginalized  $Q_{(i)}$ -functions defined in (3.1) with the normalization parameter  $\kappa_{t+1,(i)} > 0$ .

In the sequel, we simplify the symmetric updating rules in (3.1) and (3.4). Let the stepsizes be

$$\alpha_{t,(i)} = \kappa_{t+1,(i)} \cdot \bar{\alpha}_{t,(i)}, \quad \alpha'_{t,(i)} = \kappa_{t+1,(i)} / \kappa_{t,(i)} \cdot (1 - \bar{\alpha}_{t,(i)}). \quad (3.5)$$

Recall that  $\tilde{Q}_{(i)}^{\pi_t^i, \pi_t^{-i}}$ , which is the marginalized  $Q_{(i)}$ -function, is defined in (3.2). Corresponding to (3.1), we have the following symmetric updating rule for the energy functions,

$$\mathcal{E}_{t+1,(i)}(s, a^i) = \alpha'_{t,(i)} \cdot \mathcal{E}_{t,(i)}(s, a^i) + \alpha_{t,(i)} \cdot \tilde{Q}_{(i)}^{\pi_t^i, \pi_t^{-i}}(s, a^i), \quad (3.6)$$

which gives the following symmetric policy updating rule equivalent to (3.4),

$$\pi_{t+1}^i(a^i | s) \propto (\pi_t^i(a^i | s))^{\alpha'_{t,(i)}} \cdot \exp \{ \alpha_{t,(i)} \cdot \tilde{Q}_{(i)}^{\pi_t^i, \pi_t^{-i}}(s, a^i) \}.$$

We call  $\mathcal{E}_{t+1,(i)}$  the ideal energy function, since it is directly obtained from the symmetric updating rule in (3.3), which operates in the functional space given the marginalized  $Q_{(i)}$ -functions.

### 3.3 IMPLEMENTING SMOOTH FSP

In practice, it remains to approximate the ideal energy function  $\mathcal{E}_{t+1,(i)}$  within a parameterized function class, which is further used to parameterize the policy  $\pi_{t+1}^i$ . For notational simplicity, we concatenate the parameters of the policies  $\pi_{t+1}^i$  and  $\pi_{t+1}^{-i}$  into a single parameter  $\theta_{t+1} \in \Theta$ , which gives the parameterized policy pair  $[\pi_{\theta_t}^i; \pi_{\theta_t}^{-i}]$ . Meanwhile, we need to estimate the marginalized  $Q_{(i)}$ -function  $\tilde{Q}_{(i)}^{\pi_{\theta_t}^i, \pi_{\theta_t}^{-i}}(s, a^i)$  defined in (3.2). In practice, the parameterization of the energy function and the marginalized  $Q_{(i)}$ -function are set to be neural networks, which means that  $\Theta = \mathbb{R}^N$  with  $N$  being the size of the neural network. To implement smooth FSP, given  $\theta_t \in \Theta$ , we find the best parameter  $\theta_{t+1} \in \Theta$  that minimizes the mean squared error (MSE),

$$\mathbb{E}_{\sigma_t} \left[ \sum_{i \in \{1,2\}} (\mathcal{E}_{\theta_{t+1},(i)}(s, a^i) - \hat{\mathcal{E}}_{t+1,(i)}(s, a^i))^2 \right], \quad (3.7)$$

$$\text{where } \hat{\mathcal{E}}_{t+1,(i)}(s, a^i) = \alpha'_{t,(i)} \cdot \mathcal{E}_{\theta_t,(i)}(s, a^i) + \alpha_{t,(i)} \cdot \hat{\tilde{Q}}_{(i)}^{\pi_{\theta_t}^i, \pi_{\theta_t}^{-i}}(s, a^i) \quad (3.8)$$

is the estimated ideal energy function. Here  $\hat{\tilde{Q}}_{(i)}^{\pi_{\theta_t}^i, \pi_{\theta_t}^{-i}}(s, a^i)$  is the estimator of the marginalized  $Q_{(i)}$ -function  $\tilde{Q}_{(i)}^{\pi_{\theta_t}^i, \pi_{\theta_t}^{-i}}(s, a^i)$ . Such an estimator is obtained based on the data generated by smooth FSP via policy evaluation (Sutton et al., 2000). For notational simplicity, in (3.7) and the rest of the paper,

we write the stationary state-action distribution  $\sigma_{\pi_{\theta_t}^i, \pi_{\theta_t}^{-i}}$  and the stationary state distribution  $\nu_{\pi_{\theta_t}^i, \pi_{\theta_t}^{-i}}$  associated with the policy pair  $[\pi_{\theta_t}^i; \pi_{\theta_t}^{-i}]$  as  $\sigma_t$  and  $\nu_t$ , respectively.

We define the bounded function class  $\mathcal{F}_R$  with the radius  $R > 0$  as  $\mathcal{F}_R = \{f : \|f\|_\infty \leq R\}$ . Algorithm 1 gives the implementation of smooth FSP for two-player zero-sum Markov games.

---

**Algorithm 1** Smooth FSP for Two-Player Zero-Sum Markov Games

---

- 1: **Require** Two-player zero-sum Markov game  $(\mathcal{S}, \mathcal{A}^1, \mathcal{A}^2, \mathcal{P}, r, \gamma)$ , number of iterations  $T$ , regularization parameters  $\{\lambda_i\}_{i \in \{1,2\}}$ , truncation parameters  $\{Q_{(i)}^{\max}, \mathcal{E}_{(i)}^{\max}\}_{i \in \{1,2\}}$ , and stepsizes  $\{\alpha_{t,(i)}, \alpha'_{t,(i)}\}_{0 \leq t \leq T-1, i \in \{1,2\}}$
  - 2: Initialize the energy function  $\mathcal{E}_{\theta_0,(i)}(s, a^i) \leftarrow 0$  ( $i \in \{1,2\}$ )
  - 3: **For**  $t = 0, \dots, T-1$  and  $i \in \{1,2\}$  **do**
  - 4:   Set the policy  $\pi_{\theta_t}^i(\cdot | s) \propto \exp\{\mathcal{E}_{\theta_t,(i)}(s, \cdot)\}$
  - 5:   Generate the marginalized  $Q_{(i)}$ -function estimator  $\hat{Q}_{(i)}^{\pi_{\theta_t}^i, \pi_{\theta_t}^{-i}}(s, a^i) \in \mathcal{F}_{Q_{(i)}^{\max}}$  using the data generated by fictitious play with the policy pair  $[\pi_{\theta_t}^i; \pi_{\theta_t}^{-i}]$
  - 6:   Update the estimated ideal energy function
$$\hat{\mathcal{E}}_{t+1,(i)}(s, a^i) \leftarrow \alpha'_{t,(i)} \cdot \mathcal{E}_{\theta_t,(i)}(s, a^i) + \alpha_{t,(i)} \cdot \hat{Q}_{(i)}^{\pi_{\theta_t}^i, \pi_{\theta_t}^{-i}}(s, a^i)$$
  - 7:   Minimize (3.7) to obtain the energy function  $\mathcal{E}_{\theta_{t+1},(i)}(s, a^i) \in \mathcal{F}_{\mathcal{E}_{(i)}^{\max}}$
  - 8: **End**
  - 9: **Output:**  $\{\pi_{\theta_t}^i\}_{0 \leq t \leq T-1, i \in \{1,2\}}$
- 

## 4 MAIN RESULTS

In this section, we establish the convergence of smooth FSP for two-player zero-sum Markov games by casting it as regularized proximal policy optimization (PPO).

### 4.1 SMOOTH FSP AS REGULARIZED PPO

In the sequel, we connect the energy function update in (3.8) with regularized PPO. Corresponding to the estimated ideal energy function updates  $\hat{\mathcal{E}}_{t+1,(i)}$  in (3.8), we define the estimated ideal policy update as

$$\hat{\pi}_{t+1}^i(\cdot | s) \propto \exp\{\hat{\mathcal{E}}_{t+1,(i)}(s, \cdot)\}. \quad (4.1)$$

We have the following proposition states the equivalence between smooth FSP and regularized PPO.

**Proposition 4.1.** For all  $0 \leq t \leq T-1$ , let the stepsizes  $\alpha_{t,(i)}$  and  $\alpha'_{t,(i)}$  of Algorithm 1 satisfy

$$\lambda_i = (1 - \alpha'_{t,(i)})/\alpha_{t,(i)} > 0.$$

At the  $t$ -th iteration of Algorithm 1, the policy update in (4.1) is equivalent to solving the regularized PPO subproblem,

$$\begin{aligned} \hat{\pi}_{t+1}^i = \operatorname{argmax}_{\pi^i} \Big\{ \mathbb{E}_{\nu_t} \Big[ \alpha_{t,(i)} \cdot \langle \hat{Q}_{(i)}^{\pi_{\theta_t}^i, \pi_{\theta_t}^{-i}}(s, \cdot) - \lambda_i \cdot \log \pi_{\theta_t}^i(\cdot | s), \pi^i(\cdot | s) - \pi_{\theta_t}^i(\cdot | s) \rangle \\ - \text{KL}(\pi^i(\cdot | s) \parallel \pi_{\theta_t}^i(\cdot | s)) \Big] \Big\}. \end{aligned} \quad (4.2)$$

Here  $\hat{Q}_{(i)}^{\pi_{\theta_t}^i, \pi_{\theta_t}^{-i}}(s, a^i)$  is the estimator of the marginalized  $Q_{(i)}$ -function  $\tilde{Q}_{(i)}^{\pi_{\theta_t}^i, \pi_{\theta_t}^{-i}}(s, a^i)$ .

*Proof.* See Appendix A for a detailed proof.  $\square$

Proposition 4.1 implies that smooth FSP proximally improves the policy  $\pi^i$  based on the regularized performance function,

$$\mathcal{J}_{(i)}(\pi^i, \pi^{-i}) = \mathbb{E}_{\nu^*} [V_{(i)}^{\pi^i, \pi^{-i}}(s)]. \quad (4.3)$$

Proposition C.1 implies that, the smaller the regularization parameter  $\lambda_i$  is, the closer the regularized performance function  $\mathcal{J}_{(i)}$  is to the performance function  $\mathcal{J}$ . In the rest of the paper, we show that, with a proper choice of  $\lambda_i$ , smooth FSP converges to a neighborhood of a Nash equilibrium  $[\pi_*^1; \pi_*^2]$  at a sublinear rate of  $\tilde{O}(1/T)$ .

## 4.2 CONVERGENCE TO NASH EQUILIBRIUM

Let  $\mathbb{P}(s_t = s | \pi^i, \pi^{-i}, s_0 \sim \nu)$  be the probability that the trajectory, which is generated by the policy pair  $[\pi^i; \pi^{-i}]$  with the initial state distribution  $s_0 \sim \nu$ , reaches the state  $s$  at the timestep  $t$ . Correspondingly, let

$$\rho_{\nu^*}^{\pi^i, \pi^{-i}}(s) = (1 - \gamma) \cdot \sum_{t=0}^{\infty} \gamma^t \cdot \mathbb{P}(s_t = s | \pi^i, \pi^{-i}, s_0 \sim \nu) \quad (4.4)$$

be the visitation measure of  $[\pi^i; \pi^{-i}]$  with the initial state distribution  $s_0 \sim \nu$ . Also, for notational simplicity, we define

$$\rho_{\nu^*, \pi^{i'}, \pi^{-i'}}^{\pi^i, \pi^{-i}}(s) = (1 - \gamma) \cdot \sum_{t=0}^{\infty} \gamma^t \cdot \mathbb{P}(s_{t+1} = s | \pi^i, \pi^{-i}, (s_0, a_0^i, a_0^{-i}) \sim \nu \pi^{i'} \pi^{-i'}) \quad (4.5)$$

as the visitation measure of the policy pair  $[\pi^i; \pi^{-i}]$  with the initial state-action distribution  $\nu \pi^{i'} \pi^{-i'}$ . We lay out the following assumption on the concentrability coefficient. With a slight abuse of notation, we write  $\nu$  and  $\pi^{i'}$  in the subscripts as  $s$  and  $a^i$ , respectively, when they are point masses.

**Assumption 4.2** (Concentrability Coefficient). We assume that for the two-player zero-sum Markov game  $(\mathcal{S}, \mathcal{A}^1, \mathcal{A}^2, \mathcal{P}, r, \gamma)$ , there exists  $\zeta > 0$  such that

$$\mathbb{E}_{\nu^*} \left[ \left| d\rho_{s, a^i, \pi_*^{-i}}^{\pi^i, \pi_*^{-i}} / d\nu^* \right|^2 \right]^{1/2} \leq \zeta$$

for all  $s \in \mathcal{S}$ ,  $a^i \in \mathcal{A}^i$ , and  $\pi^i = \pi_{\theta_t}^i$  generated by the policy update in Line 4 of Algorithm 1. Here  $d\rho_{s, a^i, \pi_*^{-i}}^{\pi^i, \pi_*^{-i}} / d\nu^*$  is the Radon-Nikodym derivative, where  $\rho_{s, a^i, \pi_*^{-i}}^{\pi^i, \pi_*^{-i}}$  is defined in (4.5).

The notion of concentrability coefficient in Assumption 4.2 is commonly used in the literature (Munos & Szepesvári, 2008; Antos et al., 2008; Farahmand et al., 2010; Tosatto et al., 2017; Yang et al., 2019).

For all policy pairs  $[\pi^i; \pi^{-i}]$ , we define the Markov state transition kernel as

$$\mathcal{P}^{\pi^i, \pi^{-i}}(\cdot | s) = \mathbb{E}_{\pi^i, \pi^{-i}} [\mathcal{P}(\cdot | s, a^i, a^{-i})]. \quad (4.6)$$

With a slight abuse of notation, we write  $\mathcal{P}^{\pi^i, \pi^{-i}}$  as the Markov state transition operator induced by the Markov state transition kernel defined in (4.6), such that

$$[\mathcal{P}^{\pi^i, \pi^{-i}} \circ h](s) = \int_{s' \in \mathcal{S}} h(s') \mathcal{P}^{\pi^i, \pi^{-i}}(ds' | s), \quad (4.7)$$

where  $h : \mathcal{S} \rightarrow \mathbb{R}$  is an  $L_1$ -integrable function and the Lebesgue measure over  $\mathcal{S} \subset \mathbb{R}^d$  is used. Correspondingly, we define the operator norm of an operator  $\mathcal{O}$  as

$$\|\mathcal{O}\|_{\text{op}} = \sup_h \|\mathcal{O} \circ h\|_{L_1(\mathcal{S})} / \|h\|_{L_1(\mathcal{S})} = \sup_{\|h\|_{L_1(\mathcal{S})} \leq 1} \|\mathcal{O} \circ h\|_{L_1(\mathcal{S})},$$

where  $\|\cdot\|_{L_1(\mathcal{S})}$  is the  $L_1$ -norm over the state space  $\mathcal{S}$ . The following assumption characterizes the Lipschitz continuity of  $\mathcal{P}^{\pi^i, \pi^{-i}}$  and  $r^{\pi^i, \pi^{-i}}$  with respect to  $\pi^{-i}$ .

**Assumption 4.3** (Lipschitz Game). We assume that for the two-player zero-sum Markov game  $(\mathcal{S}, \mathcal{A}^1, \mathcal{A}^2, \mathcal{P}, r, \gamma)$ , there exists  $\iota_i > 0$  such that for all  $s \in \mathcal{S}$  and  $[\pi^i; \pi^{-i}]$ ,

$$\|\mathcal{P}^{\pi^i, \pi_*^{-i}} - \mathcal{P}^{\pi^i, \pi^{-i}}\|_{\text{op}} \leq \iota_i \cdot \mathbb{E}_{\nu^*} \left[ \text{KL}(\pi_*^{-i}(\cdot | s) \| \pi^{-i}(\cdot | s)) \right]^{1/2}, \quad (4.8)$$

$$|r^{\pi^i, \pi_*^{-i}}(s) - r^{\pi^i, \pi^{-i}}(s)| \leq \iota_i \cdot \text{KL}(\pi_*^{-i}(\cdot | s) \| \pi^{-i}(\cdot | s))^{1/2}. \quad (4.9)$$

The Lipschitz coefficient  $\iota_i$  in (4.8) of Assumption 4.3 quantifies to the influence of Player  $-i$  on the nonstationary environment that Payer  $i$  faces. Such a notion of influence is proposed by Radanovic et al. (2019) in the tabular setting. In particular, the expected KL-divergence between the policies is used in place of the distance  $\max_{s \in \mathcal{S}} \|\pi^{-i}(\cdot | s) - \pi^{-i'}(\cdot | s)\|_1$  in Radanovic et al. (2019). Such an assumption is also related to the linear-quadratic game (LQG) literature (see, e.g., Zhang et al. (2019)), where the Lipschitz continuity is established based on the special structure in the LQG model. In Lemma C.2, we show that such a Lipschitz coefficient  $\iota_i$  quantifies the Lipschitz continuity of the marginalized  $Q_{(i)}$ -function of the entropy-regularized two-player Markov game  $(\mathcal{S}, \mathcal{A}^1, \mathcal{A}^2, \mathcal{P}, r, \gamma, \lambda_1, \lambda_2)$ .

Recall that  $\hat{\pi}_{t+1}^i \propto \exp\{\hat{\mathcal{E}}_{t+1,(i)}\}$  is defined in (4.1), where  $\hat{\mathcal{E}}_{t+1,(i)}$  is defined in (3.8). Also, recall that  $\pi_{\theta_{t+1}}^i \propto \exp\{\mathcal{E}_{\theta_{t+1},(i)}\}$  is defined in Line 4 of Algorithm 1, where  $\mathcal{E}_{\theta_{t+1},(i)}$  is obtained by minimizing (3.7) in Line 7 of Algorithm 1. Meanwhile, we define the ideal policy update as

$$\bar{\pi}_{t+1}^i(\cdot | s) \propto \exp\{\bar{\mathcal{E}}_{t+1,(i)}(s, \cdot)\},$$

$$\text{where } \bar{\mathcal{E}}_{t+1,(i)}(s, a^i) = \alpha'_{t,(i)} \cdot \mathcal{E}_{\theta_t,(i)}(s, a^i) + \alpha_{t,(i)} \cdot \tilde{Q}_{(i)}^{\pi_{\theta_t}^i, \pi_{\theta_t}^{-i}}(s, a^i) \quad (4.10)$$

is the corresponding ideal energy function update.

We lay out the following assumption on the errors that arise from the estimation of the marginalized  $Q_{(i)}$ -function  $\tilde{Q}_{(i)}^{\pi_{\theta_t}^i, \pi_{\theta_t}^{-i}}$  and the minimization of the MSE in (3.7).

**Assumption 4.4** (Estimation Error). We assume that there exist  $\epsilon_t, \epsilon'_t > 0$  such that for all  $0 \leq t \leq T-1$ ,

$$\mathbb{E}_{\nu^*} \left[ \left\| \mathcal{E}_{\theta_{t+1},(i)}(s, \cdot) - \hat{\mathcal{E}}_{t+1,(i)}(s, \cdot) \right\|_{\infty}^2 \right] \leq \epsilon_t, \quad (4.11)$$

$$\left| \mathbb{E}_{\nu^*} \left[ \left\langle \mathcal{E}_{\theta_{t+1},(i)}(s, \cdot) - \bar{\mathcal{E}}_{t+1,(i)}(s, \cdot), \pi_*^i(\cdot | s) - \pi_{\theta_t}^i(\cdot | s) \right\rangle \right] \right| \leq \epsilon'_t. \quad (4.12)$$

Assumption 4.4 characterizes the estimation error through the policy updates in Line 7 of Algorithm 1. In particular, (4.11) upper bounds the errors arising from the minimization of the MSE in (3.7), which is zero as long as the representation power of the parameterized class of the energy functions is sufficiently strong. Meanwhile, by (3.7) and (4.10), the gap between  $\mathcal{E}_{\theta_{t+1},(i)}$  and  $\bar{\mathcal{E}}_{t+1,(i)}$  involves

(I) the gap between  $\hat{\mathcal{E}}_{t+1,(i)}$  and  $\bar{\mathcal{E}}_{t+1,(i)}$ , which arises from the gap between  $\hat{Q}_{(i)}^{\pi_{\theta_t}^i, \pi_{\theta_t}^{-i}}$  and  $\tilde{Q}_{(i)}^{\pi_{\theta_t}^i, \pi_{\theta_t}^{-i}}$ , and (II) the gap between  $\mathcal{E}_{\theta_{t+1},(i)}$  and  $\hat{\mathcal{E}}_{t+1,(i)}$ , which arises the minimization of the MSE in (3.7). Hence,  $\epsilon'_t$  in (4.12) is zero as long as the estimator  $\hat{Q}_{(i)}^{\pi_{\theta_t}^i, \pi_{\theta_t}^{-i}}$  of  $\tilde{Q}_{(i)}^{\pi_{\theta_t}^i, \pi_{\theta_t}^{-i}}$  is accurate and  $\epsilon_t$  is zero.

We summarize  $\epsilon_t$  and  $\epsilon'_t$  into the following total error  $\sigma$ ,

$$\sigma = \sum_{t=0}^{T-1} (t+1) \cdot (\epsilon_t + \epsilon'_t). \quad (4.13)$$

As discussed in Lemmas 4.7 and 4.8 of Liu et al. (2019), under Assumption 4.2, when we use sufficiently deep and wide neural networks equipped with the rectified linear unit (ReLU) activation function to parameterize the marginalized  $Q_{(i)}$ -functions and the energy functions, Assumption 4.4 can be satisfied with  $\sigma = \tilde{O}(1)$ . See Appendix B for a detailed discussion.

We are now ready to present the following theorem on the convergence of the policy sequence  $\{[\pi_{\theta_t}^1; \pi_{\theta_t}^2]\}_{0 \leq t \leq T-1}$  to a neighborhood of a Nash equilibrium  $[\pi_*^1; \pi_*^2]$ . Recall that  $Q_{(i)}^{\max}$  and  $V_{(i)}^{\max}$  are defined in (2.6) and (2.7), respectively. Also, recall that  $\zeta$  is the concentrability coefficient in Assumption 4.2,  $\iota_i$  is the Lipschitz coefficient in Assumption 4.3, and  $\sigma$  is defined in (4.13).

**Theorem 4.5** (Convergence of Smooth FSP to Nash Equilibrium). Suppose that Assumptions 4.2-4.4 hold. We set the regularization parameter  $\lambda_i \geq 2M_i$ , where

$$M_i = \left[ 2 + \sum_{i \in \{1,2\}} (V_{(i)}^{\max} + Q_{(i)}^{\max} \cdot \zeta) / (1 - \gamma) \right] \cdot \iota_i. \quad (4.14)$$

In Algorithm 1, we set  $\mathcal{E}_{(i)}^{\max} = Q_{(i)}^{\max} / (\lambda_i - M_i)$  and

$$\alpha_{t,(i)} = \frac{1}{(t+1) \cdot \min_{i \in \{1,2\}} \{\lambda_i - M_i\}}, \quad \alpha'_{t,(i)} = 1 - \frac{\lambda_i}{(t+1) \cdot \min_{i \in \{1,2\}} \{\lambda_i - M_i\}}. \quad (4.15)$$



For the policy sequence  $\{[\pi_{\theta_t}^1; \pi_{\theta_t}^2]\}_{0 \leq t \leq T-1}$  generated by the policy update in Line 7 of Algorithm 1, we have

$$\begin{aligned} \frac{1}{T} \cdot \sum_{t=0}^{T-1} [\mathcal{J}(\pi_{\theta_t}^1, \pi_{\theta_t}^2) - \mathcal{J}(\pi_{\theta_t}^1, \pi_{\theta_t}^2)] &\leq \frac{\sum_{i \in \{1,2\}} [2 + 2\lambda_i^2/(\lambda_i - M_i)^2] \cdot (Q_{(i)}^{\max})^2}{(1-\gamma) \cdot \min_{i \in \{1,2\}} \{\lambda_i - M_i\}} \cdot \frac{\log T}{T} \\ &\quad + \frac{2\sigma \cdot \min_{i \in \{1,2\}} \{\lambda_i - M_i\}}{(1-\gamma) \cdot T} + \sum_{i \in \{1,2\}} \lambda_i \cdot \log |\mathcal{A}^i|. \end{aligned} \quad (4.16)$$

*Proof.* See Appendix C for a detailed proof. The key to our proof is the convergence of infinite-dimensional mirror descent with the primal and dual errors. In particular, the errors are characterized in Appendix B.  $\square$

Recall that the Lipschitz coefficient  $\iota_i$  is defined in Assumption 4.3. In Lemma C.2, we interpret  $\iota_i$  as the Lipschitz coefficient of the marginalized  $Q_{(i)}$ -function. Meanwhile, recall that Theorem 4.5 requires  $\lambda_i \geq 2M_i$ , where  $M_i$  scales linearly with  $\iota_i$ . Hence, the smaller the Lipschitz coefficient  $\iota_i$  is, the smaller the regularization parameter  $\lambda_i$  can be, which in turn leads to a smaller regularization bias characterized in Proposition C.1. Thus, the policy sequence  $\{[\pi_{\theta_t}^1; \pi_{\theta_t}^2]\}_{0 \leq t \leq T-1}$  generated by Algorithm 1 converges to a smaller neighborhood of a Nash equilibrium  $[\pi_{\theta_t}^1; \pi_{\theta_t}^2]$ .

We give the following two sufficient conditions for the Lipschitz coefficients. (I) The two players have similar influence to the game, i.e.,  $\iota_1/\iota_2 = O(1)$ : a sufficient requirement on both of the Lipschitz coefficients is

$$\iota_i \leq (1-\gamma)^2 / [8(1+\gamma) \cdot \log |\mathcal{A}^i|], \quad i \in \{1, 2\}.$$

(II) One of the two players (without loss of generality, we assume it is Player 2) has dominant influence to the game compared to the other: let  $\iota_1/\iota_2 = z > 0$ , in which case we set  $M_i$  in (4.14) as

$$M_i = \sqrt{2z} \cdot [2 + \sum_{i \in \{1,2\}} (V_{(i)}^{\max} + Q_{(i)}^{\max} \cdot \zeta)/(1-\gamma)] \cdot \iota_2, \quad \{1, 2\}.$$

Then one sufficient requirement on the ratio  $z$  is

$$z \leq (1-\gamma)^4 / [16(1+\gamma)\iota_2 \cdot \log(|\mathcal{A}^1| \cdot |\mathcal{A}^2|)]^2.$$

As  $z$  moves towards zero, the convergence guarantee approaches those for single-controller case. Please see Appendix I for a more detailed illustration on case(II).

We remark in the following that, with stronger assumptions, we can strengthen Theorem 4.5 to satisfy Hannan consistency.

**Remark 4.6** (Hannan Consistency). When Assumptions 4.2-4.4 hold for any policy  $[\pi^{i'}; \pi^{-i'}]$  instead of only a Nash equilibrium  $[\pi_{\theta_t}^i; \pi_{\theta_t}^{-i}]$ , we can prove that, when one of the player does not update the policy as described in Algorithm 1, the opposing player can exploit the strategies it plays. Specifically, for example, when Player 2 plays the policy sequence  $\{\tilde{\pi}_t^2\}_{0 \leq t \leq T-1}$  while Player 1 updates its policy according to Algorithm 1, we have

$$\begin{aligned} \sup_{\pi^1} \left\{ \frac{1}{T} \cdot \sum_{t=0}^{T-1} [\mathcal{J}(\pi^1, \tilde{\pi}_t^2) - \mathcal{J}(\pi_{\theta_t}^1, \tilde{\pi}_t^2)] \right\} \\ \leq \frac{\sigma \cdot (\lambda_1 - M_1)}{(1-\gamma) \cdot T} + \frac{[2 + 2\lambda_1^2/(\lambda_1 - M_1)^2] \cdot (Q_{(1)}^{\max})^2}{(1-\gamma) \cdot (\lambda_1 - M_1)} \cdot \frac{\log T}{T} + \lambda_1 \cdot \log |\mathcal{A}^1|, \end{aligned} \quad (4.17)$$

which implies that the policy sequence  $\{\pi_{\theta_t}^1\}_{0 \leq t \leq T-1}$  converges to the best policy in hindsight with respect to  $\{\tilde{\pi}_t^2\}_{0 \leq t \leq T-1}$ . As a consequence, we can also replace the left-hand side of (4.16) by the following duality gap,

$$\sup_{\pi^1} \left\{ \frac{1}{T} \cdot \sum_{t=0}^{T-1} \mathcal{J}(\pi^1, \pi_{\theta_t}^2) \right\} - \inf_{\pi^2} \left\{ \frac{1}{T} \cdot \sum_{t=0}^{T-1} \mathcal{J}(\pi_{\theta_t}^1, \pi^2) \right\}. \quad (4.18)$$

See Appendix J for a more detailed illustration on Remark 4.6.

## REFERENCES

- Alekh Agarwal, Sham M Kakade, Jason D Lee, and Gaurav Mahajan. Optimality and approximation with policy gradient methods in markov decision processes. *arXiv preprint arXiv:1908.00261*, 2019.
- Zeyuan Allen-Zhu, Yuanzhi Li, and Yingyu Liang. Learning and generalization in overparameterized neural networks, going beyond two layers. *arXiv preprint arXiv:1811.04918*, 2018.
- András Antos, Csaba Szepesvári, and Rémi Munos. Fitted Q-iteration in continuous action-space mdps. In *Advances in Neural Information Processing Systems*, pp. 9–16, 2008.
- Sanjeev Arora, Simon S Du, Wei Hu, Zhiyuan Li, and Ruosong Wang. Fine-grained analysis of optimization and generalization for overparameterized two-layer neural networks. *arXiv preprint arXiv:1901.08584*, 2019.
- David Balduzzi, Sebastien Racaniere, James Martens, Jakob Foerster, Karl Tuyls, and Thore Graepel. The mechanics of n-player differentiable games. *arXiv preprint arXiv:1802.05642*, 2018.
- Christopher Berner, Greg Brockman, Brooke Chan, Vicki Cheung, Przemysław Debiak, Christy Dennison, David Farhi, Quirin Fischer, Shariq Hashme, Chris Hesse, et al. Dota 2 with large scale deep reinforcement learning. *arXiv preprint arXiv:1912.06680*, 2019.
- Lucian Bu, Robert Babu, Bart De Schutter, et al. A comprehensive survey of multiagent reinforcement learning. *IEEE Transactions on Systems, Man, and Cybernetics, Part C (Applications and Reviews)*, 38(2):156–172, 2008.
- Qi Cai, Zhuoran Yang, Jason D Lee, and Zhaoran Wang. Neural temporal-difference learning converges to global optima. *arXiv preprint arXiv:1905.10027*, 2019.
- Shicong Cen, Chen Cheng, Yuxin Chen, Yuting Wei, and Yuejie Chi. Fast global convergence of natural policy gradient methods with entropy regularization. *arXiv preprint arXiv:2007.06558*, 2020.
- Ashish Cherukuri, Bahman Ghahsifard, and Jorge Cortes. Saddle-point dynamics: conditions for asymptotic stability of saddle points. *SIAM Journal on Control and Optimization*, 55(1):486–511, 2017.
- Lenaïc Chizat and Francis Bach. A note on lazy training in supervised differentiable programming. *arXiv preprint arXiv:1812.07956*, 2018.
- Vincent Conitzer and Tuomas Sandholm. Awesome: A general multiagent learning algorithm that converges in self-play and learns a best response against stationary opponents. *Machine Learning*, 67(1-2):23–43, 2007.
- Bo Dai, Albert Shaw, Lihong Li, Lin Xiao, Niao He, Zhen Liu, Jianshu Chen, and Le Song. SBEED: Convergent reinforcement learning with nonlinear function approximation. *arXiv preprint arXiv:1712.10285*, 2017.
- Amit Daniely, Roy Frostig, and Yoram Singer. Toward deeper understanding of neural networks: The power of initialization and a dual view on expressivity. In *Advances in Neural Information Processing Systems*, pp. 2253–2261, 2016.
- Constantinos Daskalakis and Ioannis Panageas. The limit points of (optimistic) gradient descent in min-max optimization. In *Advances in Neural Information Processing Systems*, pp. 9236–9246, 2018.
- William Dudziak. Using fictitious play to find pseudo-optimal solutions for full-scale poker. In *IC-AI*, pp. 374–380, 2006.
- Francisco Facchinei and Jong-Shi Pang. *Finite-Dimensional Variational Inequalities and Complementarity Problems*. Springer Science & Business Media, 2007.

- Amir-massoud Farahmand, Csaba Szepesvári, and Rémi Munos. Error propagation for approximate policy and value iteration. In *Advances in Neural Information Processing Systems*, pp. 568–576, 2010.
- Matthieu Geist, Bruno Scherrer, and Olivier Pietquin. A theory of regularized Markov decision processes. *arXiv preprint arXiv:1901.11275*, 2019.
- Johannes Heinrich and David Silver. Deep reinforcement learning from self-play in imperfect-information games. *arXiv preprint arXiv:1603.01121*, 2016.
- Johannes Heinrich, Marc Lanctot, and David Silver. Fictitious self-play in extensive-form games. In *International Conference on Machine Learning*, pp. 805–813, 2015.
- Daniel Hennes, Dustin Morrill, Shayegan Omidshafiei, Rémi Munos, Julien Perolat, Marc Lanctot, Audrunas Gruslys, Jean-Baptiste Lespiau, Paavo Parmas, Edgar Du‘e nez-Guzm‘an, et al. Neural replicator dynamics: Multiagent learning via hedging policy gradients. In *Proceedings of the 19th International Conference on Autonomous Agents and MultiAgent Systems*, pp. 492–501, 2020.
- Junling Hu and Michael P Wellman. Nash Q-learning for general-sum stochastic games. *Journal of Machine Learning Research*, 4(Nov):1039–1069, 2003.
- Feihu Huang, Shangqian Gao, Jian Pei, and Heng Huang. Momentum-based policy gradient methods. *arXiv preprint arXiv:2007.06680*, 2020.
- Arthur Jacot, Franck Gabriel, and Clément Hongler. Neural tangent kernel: Convergence and generalization in neural networks. In *Advances in Neural Information Processing Systems*, pp. 8571–8580, 2018.
- Sham Kakade. A natural policy gradient. In *Advances in Neural Information Processing Systems*, pp. 1531–1538, 2002.
- Sham Kakade and John Langford. Approximately optimal approximate reinforcement learning. In *International Conference on Machine Learning*, pp. 267–274, 2002.
- Keigo Kawamura, Naoki Mizukami, and Yoshimasa Tsuruoka. Neural fictitious self-play in imperfect information games with many players. In *Workshop on Computer Games*, pp. 61–74. Springer, 2017.
- Valentin Khrulkov, Alexander Novikov, and Ivan Oseledets. Expressive power of recurrent neural networks. *arXiv preprint arXiv:1711.00811*, 2017.
- Vijay R Konda and John N Tsitsiklis. Actor-critic algorithms. In *Advances in Neural Information Processing Systems*, pp. 1008–1014, 2000.
- Michail Lagoudakis and Ron Parr. Value function approximation in zero-sum Markov games. *arXiv preprint arXiv:1301.0580*, 2012.
- Andrzej Lasota and Michael C Mackey. *Chaos, Fractals, and Noise: Stochastic Aspects of Dynamics*, volume 97. Springer Science & Business Media, 2013.
- Jaehoon Lee, Lechao Xiao, Samuel S Schoenholz, Yasaman Bahri, Jascha Sohl-Dickstein, and Jeffrey Pennington. Wide neural networks of any depth evolve as linear models under gradient descent. *arXiv preprint arXiv:1902.06720*, 2019.
- Michael L Littman. Markov games as a framework for multi-agent reinforcement learning. In *Machine Learning Proceedings 1994*, pp. 157–163. Elsevier, 1994.
- Boyi Liu, Qi Cai, Zhuoran Yang, and Zhaoran Wang. Neural proximal/trust region policy optimization attains globally optimal policy. *arXiv preprint arXiv:1906.10306*, 2019.
- Eric Mazumdar and Lillian J Ratliff. On the convergence of competitive, multi-agent gradient-based learning. *arXiv preprint arXiv:1804.05464*, 2018.

- Panayotis Mertikopoulos, Bruno Lecouat, Houssam Zenati, Chuan-Sheng Foo, Vijay Chandrasekhar, and Georgios Piliouras. Optimistic mirror descent in saddle-point problems: Going the extra (gradient) mile. *arXiv preprint arXiv:1807.02629*, 2018.
- Volodymyr Mnih, Adria Puigdomenech Badia, Mehdi Mirza, Alex Graves, Timothy Lillicrap, Tim Harley, David Silver, and Koray Kavukcuoglu. Asynchronous methods for deep reinforcement learning. In *International Conference on Machine Learning*, pp. 1928–1937, 2016.
- Rémi Munos and Csaba Szepesvári. Finite-time bounds for fitted value iteration. *Journal of Machine Learning Research*, 9(May):815–857, 2008.
- Arkadi S Nemirovski and David B Yudin. *Problem Complexity and Method Efficiency in Optimization*. Springer, 1983.
- Yurii Nesterov. *Introductory Lectures on Convex Optimization: A Basic Course*, volume 87. Springer Science & Business Media, 2013.
- Brendan O’Donoghue, Remi Munos, Koray Kavukcuoglu, and Volodymyr Mnih. Combining policy gradient and Q-learning. *arXiv preprint arXiv:1611.01626*, 2016.
- Matteo Papini, Damiano Binaghi, Giuseppe Canonaco, Matteo Pirota, and Marcello Restelli. Stochastic variance-reduced policy gradient. In *ICML 2018-35th International Conference on Machine Learning*, volume 80, pp. 4026–4035, 2018.
- Julien Pérolat, Bilal Piot, Bruno Scherrer, and Olivier Pietquin. On the use of non-stationary strategies for solving two-player zero-sum markov games. In *International Conference on Artificial Intelligence and Statistics*, pp. 893–901, 2016.
- Julien Perolat, Bilal Piot, and Olivier Pietquin. Actor-critic fictitious play in simultaneous move multistage games. 2018.
- Goran Radanovic, Rati Devidze, David C Parkes, and Adish Singla. Learning to collaborate in Markov decision processes. *arXiv preprint arXiv:1901.08029*, 2019.
- Hassan Rafique, Mingrui Liu, Qihang Lin, and Tianbao Yang. Non-convex min-max optimization: Provable algorithms and applications in machine learning. *arXiv preprint arXiv:1810.02060*, 2018.
- Julia Robinson. An iterative method of solving a game. *Annals of Mathematics*, pp. 296–301, 1951.
- John Schulman, Filip Wolski, Prafulla Dhariwal, Alec Radford, and Oleg Klimov. Proximal policy optimization algorithms. *arXiv preprint arXiv:1707.06347*, 2017.
- Lior Shani, Yonathan Efroni, and Shie Mannor. Adaptive trust region policy optimization: Global convergence and faster rates for regularized MDPs. *arXiv preprint arXiv:1909.02769*, 2019.
- Lloyd S Shapley. Stochastic games. *Proceedings of the National Academy of Sciences*, 39(10): 1095–1100, 1953.
- Zebang Shen, Alejandro Ribeiro, Hamed Hassani, Hui Qian, and Chao Mi. Hessian aided policy gradient. In *International Conference on Machine Learning*, pp. 5729–5738, 2019.
- David Silver, Aja Huang, Chris J Maddison, Arthur Guez, Laurent Sifre, George Van Den Driessche, Julian Schrittwieser, Ioannis Antonoglou, Veda Panneershelvam, Marc Lanctot, et al. Mastering the game of Go with deep neural networks and tree search. *Nature*, 529(7587):484, 2016.
- David Silver, Julian Schrittwieser, Karen Simonyan, Ioannis Antonoglou, Aja Huang, Arthur Guez, Thomas Hubert, Lucas Baker, Matthew Lai, Adrian Bolton, et al. Mastering the game of Go without human knowledge. *Nature*, 550(7676):354–359, 2017.
- Richard S Sutton and Andrew G Barto. *Reinforcement Learning: An Introduction*. MIT press, 2018.
- Richard S Sutton, David A McAllester, Satinder P Singh, and Yishay Mansour. Policy gradient methods for reinforcement learning with function approximation. In *Advances in Neural Information Processing Systems*, pp. 1057–1063, 2000.

- Brian Swenson and H Vincent Poor. Smooth fictitious play in  $N \times 2$  potential games. In *2019 53rd Asilomar Conference on Signals, Systems, and Computers*, pp. 1739–1743. IEEE, 2019.
- Samuele Tosatto, Matteo Pirodda, Carlo D’Eramo, and Marcello Restelli. Boosted fitted Q-iteration. In *International Conference on Machine Learning*, pp. 3434–3443, 2017.
- Oriol Vinyals, Igor Babuschkin, Wojciech M Czarnecki, Michaël Mathieu, Andrew Dudzik, Junyoung Chung, David H Choi, Richard Powell, Timo Ewalds, Petko Georgiev, et al. Grandmaster level in StarCraft II using multi-agent reinforcement learning. *Nature*, 575(7782):350–354, 2019.
- John Von Neumann and Oskar Morgenstern. *Theory of games and economic behavior (commemorative edition)*. Princeton university press, 2007.
- Lingxiao Wang, Qi Cai, Zhuoran Yang, and Zhaoran Wang. Neural policy gradient methods: Global optimality and rates of convergence. *arXiv preprint arXiv:1909.01150*, 2019.
- Nan Xiao, Xuehe Wang, Tichakorn Wongpiromsarn, Keyou You, Lihua Xie, Emilio Frazzoli, and Daniela Rus. Average strategy fictitious play with application to road pricing. In *2013 American Control Conference*, pp. 1920–1925. IEEE, 2013.
- Pan Xu, Felicia Gao, and Quanquan Gu. Sample efficient policy gradient methods with recursive variance reduction. *arXiv preprint arXiv:1909.08610*, 2019.
- Pan Xu, Felicia Gao, and Quanquan Gu. An improved convergence analysis of stochastic variance-reduced policy gradient. In *Uncertainty in Artificial Intelligence*, pp. 541–551. PMLR, 2020.
- Zhuora Yang, Yuchen Xie, and Zhaoran Wang. A theoretical analysis of deep Q-learning. *arXiv preprint arXiv:1901.00137*, 2019.
- Kaiqing Zhang, Zhuoran Yang, Han Liu, Tong Zhang, and Tamer Başar. Fully decentralized multi-agent reinforcement learning with networked agents. *arXiv preprint arXiv:1802.08757*, 2018.
- Kaiqing Zhang, Zhuoran Yang, and Tamer Basar. Policy optimization provably converges to Nash equilibria in zero-sum linear quadratic games. In *Advances in Neural Information Processing Systems*, pp. 11602–11614, 2019.
- Kaiqing Zhang, Sham Kakade, Tamer Basar, and Lin Yang. Model-based multi-agent RL in zero-sum Markov games with near-optimal sample complexity. *Advances in Neural Information Processing Systems*, 33, 2020.
- Shaofeng Zou, Tengyu Xu, and Yingbin Liang. Finite-sample analysis for SARSA with linear function approximation. In *Advances in Neural Information Processing Systems*, pp. 8668–8678, 2019.

## A PROOF OF PROPOSITION 4.1

*Proof.* For all  $(s, a^i) \in \mathcal{S} \times \mathcal{A}^i$ , taking the derivative of the Lagrangian of the optimization problem with simplex constraints over  $\pi^i$ ,

$$\begin{aligned} \alpha_{t,(i)} \cdot \langle \widehat{Q}_{(i)}^{\pi_{\theta_t}^i, \pi_{\theta_t}^{-i}}(s, \cdot) - \lambda_i \cdot \log \pi_{\theta_t}^i(\cdot | s), \pi^i(\cdot | s) - \pi_{\theta_t}^i(\cdot | s) \rangle \\ - \text{KL}(\pi^i(\cdot | s) \| \pi_{\theta_t}^i(\cdot | s)) + C \cdot \left( \sum_{a^i \in \mathcal{A}^i} \pi^i(a^i | s) - 1 \right) + C' \cdot \sum_{a^i \in \mathcal{A}^i} \pi^i(a^i | s) \end{aligned}$$

with respect to  $\pi^i(a^i | s)$ , we obtain

$$\alpha_{t,(i)} \cdot (\widehat{Q}_{(i)}^{\pi_{\theta_t}^i, \pi_{\theta_t}^{-i}}(s, a^i) - \lambda_i \cdot \log \pi_{\theta_t}^i(a^i | s)) - \log \pi^i(a^i | s) + \log \pi_{\theta_t}^i(a^i | s) + C + C' - 1, \quad (\text{A.1})$$

where  $C$  is a constant. Setting (A.1) to zero we further have

$$\begin{aligned} \pi_{t+1}^i(a^i | s) &= (\pi_{\theta_t}^i(a^i | s))^{1 - \lambda_i \alpha_{t,(i)}} \cdot \exp\{\alpha_{t,(i)} \cdot \widehat{Q}_{(i)}^{\pi_{\theta_t}^i, \pi_{\theta_t}^{-i}}(s, a^i) + C + C' - 1\} \\ &= \exp\{\alpha'_{t,(i)} \cdot \mathcal{E}_{\theta_t,(i)}(s, a^i) + \alpha_{t,(i)} \cdot \widehat{Q}_{(i)}^{\pi_{\theta_t}^i, \pi_{\theta_t}^{-i}}(s, a^i) + C + C' - 1\}, \end{aligned}$$

where the second equality follows from  $\lambda_i = (1 - \alpha'_{t,(i)})/\alpha_{t,(i)}$ . Thus, we know that (4.2) is

$\pi_{t+1}^i(\cdot | s) \propto \exp\{\alpha'_{t,(i)} \cdot \mathcal{E}_{\theta_t,(i)}(s, \cdot) + \alpha_{t,(i)} \cdot \widehat{Q}_{(i)}^{\pi_{\theta_t}^i, \pi_{\theta_t}^{-i}}(s, \cdot)\}$ , which coincides with (3.3). Therefore, we finish the proof.  $\square$

## B DISCUSSION ON ASSUMPTION 4.4

In this section, we make a detailed discussion on Assumption 4.4. First, we give the following condition on the mean squared error of the estimations  $\widehat{Q}_{(i)}^{\pi_{\theta_t}^i, \pi_{\theta_t}^{-i}}$  and  $\mathcal{E}_{\theta_{t+1},(i)}$ .

**Condition B.1** (Approximation Error). For all  $0 \leq t \leq T - 1$ , the estimator  $\widehat{Q}_{(i)}^{\pi_{\theta_t}^i, \pi_{\theta_t}^{-i}}(s, a^i)$  of the marginalized  $Q_{(i)}$ -function  $\widetilde{Q}_{(i)}^{\pi_{\theta_t}^i, \pi_{\theta_t}^{-i}}(s, a^i)$  satisfies

$$\mathbb{E}_{\sigma_t} \left[ (\widehat{Q}_{(i)}^{\pi_{\theta_t}^i, \pi_{\theta_t}^{-i}}(s, a^i) - \widetilde{Q}_{(i)}^{\pi_{\theta_t}^i, \pi_{\theta_t}^{-i}}(s, a^i))^2 \right] \leq \varepsilon_t, \quad (\text{B.1})$$

and the energy function update  $\mathcal{E}_{\theta_{t+1},(i)}(s, a^i)$  satisfy

$$\mathbb{E}_{\sigma_t} \left[ (\mathcal{E}_{\theta_{t+1},(i)}(s, a^i) - \widehat{\mathcal{E}}_{\theta_{t+1},(i)}(s, a^i))^2 \right] \leq \varepsilon'_t. \quad (\text{B.2})$$

Condition B.1 can be satisfied for arbitrary small errors  $\varepsilon_t$  and  $\varepsilon'_t$  if the following conditions are satisfied: (I) the representation powers of parametrization  $\mathcal{E}_{\theta_{t+1},(i)}(s, a^i)$  and the parameterization of  $\widehat{Q}_{(i)}^{\pi_{\theta_t}^i, \pi_{\theta_t}^{-i}}$  are strong enough. (II) the algorithms for learning  $\widehat{\mathcal{E}}_{\theta_{t+1},(i)}(s, a^i)$  and  $\widehat{Q}_{(i)}^{\pi_{\theta_t}^i, \pi_{\theta_t}^{-i}}$  attain stationary points after sufficiently many iterations. In this section, as an example, we take the most commonly used neural network parameterization for  $\mathcal{E}_{\theta_{t+1},(i)}(s, a^i)$  and  $\widehat{Q}_{(i)}^{\pi_{\theta_t}^i, \pi_{\theta_t}^{-i}}$ .

**Representation Power.** There is a line of literature discussing the representation power of neural networks (see, e.g., Daniely et al. (2016); Khrulkov et al. (2017)) showing that the overparameterized neural networks possess strong representation power. Specifically, the representation power of neural networks can be approximated as a subset of the reproducing kernel Hilbert space (RKHS) with neural tangent kernel (Jacot et al., 2018; Chizat & Bach, 2018; Allen-Zhu et al., 2018; Lee et al., 2019; Arora et al., 2019), which is a sufficiently rich function class. Moreover, we present the following lemma justifying the choice of the truncation parameter  $\mathcal{E}_{(i)}^{\max}$  in Theorem 4.5.

**Lemma B.2** (Bounded Energy Function). Let the regularization parameter  $\lambda_i$  and the stepsizes  $\alpha_{t,(i)}, \alpha'_{t,(i)}$  be chosen as in Theorem 4.5. In Algorithm 1, setting  $\mathcal{E}_{(i)}^{\max} = Q_{(i)}^{\max}/(\lambda_i - M_i)$  makes the function class  $\mathcal{F}_{\mathcal{E}_{(i)}^{\max}}$  always cover the range of the estimated energy function update  $\widehat{\mathcal{E}}_{t,(i)}$  obtained in Line 6 of Algorithm 1.

*Proof.* See Appendix H for a detailed proof.  $\square$

Lemma B.2 states that, truncating the energy functions  $\mathcal{E}_{\theta_t, (i)}$  within the function class  $\mathcal{F}_{Q_{(i)}^{\max}/(\lambda_i - M_i)}$  does not compromise the MSE  $\varepsilon'_t$  defined in (B.2).

**Learning Algorithms.** There are some recent advances (Cai et al., 2019; Liu et al., 2019) showing that, when equipped with neural network parameterization, temporal-difference (TD) learning converges to the stationary point. Also, as discussed in Liu et al. (2019), under neural network parameterization, stochastic gradient descent also converges to the optima at a sublinear rate.

Next, by Lemmas 4.7-4.8 of Liu et al. (2019), we lay out error bounds in the form of those in Assumption 4.4.

**Lemma B.3.**  $\epsilon_t$  and  $\epsilon'_t$  in Assumption 4.4 take the forms of

$$\epsilon_t = \max_{i \in \{1, 2\}} \{|\mathcal{A}^i|\} \cdot (\varepsilon'_t)^2, \quad \epsilon'_t = \varepsilon'_t \cdot \max_{i \in \{1, 2\}} \{\phi_{\pi_{\theta_t}}^*\} + \varepsilon_t \cdot \psi_t^*,$$

where

$$\psi_t^* = \mathbb{E}_{\sigma_t} \left[ \left| \frac{d\sigma^*}{d\sigma_t} - \frac{d\nu^*}{d\nu_t} \right| \right], \quad \phi_{\pi_{\theta_t}}^* = \mathbb{E}_{\sigma_t} \left[ \left| \frac{d\pi_{\sigma_t}^i}{d\pi_0^i} - \frac{d\pi_{\theta_t}^i}{d\pi_0^i} \right| \right],$$

Here the density ratios are Radon-Nikodym derivatives.

Thus, as long as the learning algorithms run sufficiently many iterations such that the errors  $\varepsilon_t$  and  $\varepsilon'_t$  are sufficiently small, for  $\sigma$  defined in (4.13),  $\sigma = \tilde{O}(1)$  can be achieved. Finally, we remark that, with some recent advances in the variance reduced techniques for policy optimization (Papini et al., 2018; Xu et al., 2020; Shen et al., 2019; Xu et al., 2019; Huang et al., 2020), we expect the MSEs in (B.1) and (B.2) being further reduced, which could possibly allow us to use relatively smaller neural networks for  $\widehat{Q}_{(i)}^{\pi_{\theta_t}^i, \pi_{\theta_t}^{-i}}$  and  $\mathcal{E}_{\theta_{t+1}, (i)}$ . This can help to boost practicality of smooth FSP due to the reduced computational cost associated with the reduced network size. We leave this direction to our future research.

## C PROOF OF THEOREM 4.5

In this section, we lay out the proof of Theorem 4.5. We have the following proposition on the regularization bias of  $\mathcal{J}_{(i)}(\pi^i, \pi^{-i})$  defined in (4.3).

**Proposition C.1** (Regularization Bias). The regularized performance function  $\mathcal{J}_{(i)}(\pi^i, \pi^{-i})$  satisfies

$$\mathcal{J}(\pi^1, \pi^2) < \mathcal{J}_{(1)}(\pi^1, \pi^2) \leq \mathcal{J}(\pi^1, \pi^2) + \frac{\lambda_1 \cdot \log |\mathcal{A}^1|}{1 - \gamma}, \quad (\text{C.1})$$

$$-\mathcal{J}(\pi^1, \pi^2) < \mathcal{J}_{(2)}(\pi^2, \pi^1) \leq -\mathcal{J}(\pi^1, \pi^2) + \frac{\lambda_2 \cdot \log |\mathcal{A}^2|}{1 - \gamma} \quad (\text{C.2})$$

for all policy pairs  $[\pi^1, \pi^2]$ .

*Proof.* See Appendix D for a detailed proof.  $\square$

Based on Assumptions 4.2 and 4.3, we have the following lemma on the Lipschitz continuity of the marginalized  $Q_{(i)}$ -function. Recall that  $\zeta$  is the concentrability coefficient in Assumption 4.2 and  $\iota_i$  is the Lipschitz coefficient in Assumption 4.3.

**Lemma C.2** (Lipschitz Marginalized  $Q_{(i)}$ -Function). Suppose that Assumption 4.2 holds. We choose the regularization parameter  $\lambda_i$ , the truncation parameter  $\mathcal{E}_{(i)}^{\max}$ , and the stepsizes  $\alpha_{t, (i)}$ ,  $\alpha'_{t, (i)}$  as in Theorem 4.5. We have for all  $[\pi^i; \pi^{-i}] = [\pi_{\theta_t}^i; \pi_{\theta_t}^{-i}]$  generated by the policy update in Line 4 of

Algorithm 1 that,

$$\begin{aligned} & \left| \mathbb{E}_{\nu^*} \left[ \langle \tilde{Q}_{(i)}^{\pi^i, \pi^{-i}}(s, \cdot) - \tilde{Q}_{(i)}^{\pi^i, \pi^{-i}}(s, \cdot), \pi^i(\cdot | s) - \pi^i(\cdot | s) \rangle \right] \right| \\ & \leq \sqrt{2\ell_i \cdot \ell_{-i}} \cdot \left\{ \mathbb{E}_{\nu^*} \left[ \text{KL}(\pi^i(\cdot | s) \| \pi^i(\cdot | s))^{1/2} \cdot \text{KL}(\pi^{-i}(\cdot | s) \| \pi^{-i}(\cdot | s))^{1/2} \right] \right. \\ & \quad \left. + \frac{V_{(i)}^{\max} + Q_{(i)}^{\max} \cdot \zeta}{1 - \gamma} \cdot \mathbb{E}_{\nu^*} \left[ \text{KL}(\pi^i(\cdot | s) \| \pi^i(\cdot | s)) \right]^{1/2} \cdot \mathbb{E}_{\nu^*} \left[ \text{KL}(\pi^{-i}(\cdot | s) \| \pi^{-i}(\cdot | s)) \right]^{1/2} \right\}. \end{aligned}$$

*Proof.* See Appendix E for a detailed proof.  $\square$

Recall that  $\mathcal{J}_{(i)}(\pi^i, \pi^{-i})$  is defined in (4.3). We present the following extended performance difference lemma, which extends the performance difference lemma of Kakade & Langford (2002) to the two-agent setting with entropy regularization.

**Lemma C.3** (Extended Performance Difference). We have for all  $[\pi^i; \pi^{-i}]$  that,

$$\begin{aligned} & [\mathcal{J}_{(i)}(\pi^i, \pi^{-i}) - \mathcal{J}_{(i)}(\pi^i, \pi^{-i})] + \frac{\lambda_i}{1 - \gamma} \cdot \mathbb{E}_{\nu^*} \left[ \text{KL}(\pi^i(\cdot | s) \| \pi^i(\cdot | s)) \right] \\ & = \frac{1}{1 - \gamma} \cdot \mathbb{E}_{\nu^*} \left[ \langle \tilde{Q}_{(i)}^{\pi^i, \pi^{-i}}(s, \cdot) - \lambda_i \cdot \log \pi^i(\cdot | s), \pi^i(\cdot | s) - \pi^i(\cdot | s) \rangle \right]. \end{aligned}$$

*Proof.* See Appendix F for a detailed proof.  $\square$

The following lemma establishes the one-step descent of the KL-divergence between a Nash equilibrium  $[\pi_*^1; \pi_*^2]$  and the policy sequence  $\{[\pi_{\theta_t}^1; \pi_{\theta_t}^2]\}_{0 \leq t \leq T-1}$  generated by Line 4 of Algorithm 1 in the infinite-dimensional policy space, which extends the analysis of mirror descent (Nemirovski & Yudin, 1983; Nesterov, 2013). Recall that the energy function  $\mathcal{E}_{\theta_t, (i)}$  is obtained in Line 7 of Algorithm 1 and the ideal energy function update  $\bar{\mathcal{E}}_{t+1, (i)}$  is defined in (4.10).

**Lemma C.4** (One-Step Descent). Suppose that the stepsizes satisfy  $\alpha'_{t, (i)} = 1 - \lambda_i \alpha_{t, (i)}$ . For the policy sequence  $\{\pi_{\theta_t}^i\}_{0 \leq t \leq T-1}$  generated by the policy update in Line 4 of Algorithm 1, we have for all  $s \in \mathcal{S}$  that,

$$\begin{aligned} & \text{KL}(\pi^i(\cdot | s) \| \pi_{\theta_{t+1}}^i(\cdot | s)) - \text{KL}(\pi^i(\cdot | s) \| \pi_{\theta_t}^i(\cdot | s)) \\ & \geq \langle \mathcal{E}_{\theta_{t+1}, (i)}(s, \cdot) - \bar{\mathcal{E}}_{t+1, (i)}(s, \cdot), \pi^i(\cdot | s) - \pi_{\theta_t}^i(\cdot | s) \rangle - 1/2 \cdot \|\mathcal{E}_{\theta_{t+1}, (i)}(s, \cdot) - \mathcal{E}_{\theta_t, (i)}(s, \cdot)\|_{\infty}^2 \\ & \quad + \alpha_{t, (i)} \cdot \langle -\tilde{Q}_{(i)}^{\pi_{\theta_t}^i, \pi_{\theta_t}^{-i}}(s, \cdot) + \lambda_i \cdot \log \pi_{\theta_t}^i(\cdot | s), \pi^i(\cdot | s) - \pi_{\theta_t}^i(\cdot | s) \rangle. \end{aligned} \tag{C.3}$$

*Proof.* See Appendix G for a detailed proof.  $\square$

*Proof of Theorem 4.5.* For notational simplicity, we write  $\text{KL}(\pi^i(\cdot | s) \| \pi_{\theta_{t+1}}^i(\cdot | s))$  as  $\text{KL}_{t, (i)}(s)$  throughout this proof. By the choices of the stepsizes in (4.15) of Theorem 4.5, we have  $\alpha'_{t, (i)} = 1 - \lambda_i \alpha_{t, (i)}$ . By Lemma C.4, we have under (4.12) of Assumption 4.4 that,

$$\begin{aligned} & \mathbb{E}_{\nu^*} [\text{KL}_{t+1, (i)}(s)] - \mathbb{E}_{\nu^*} [\text{KL}_{t, (i)}(s)] \\ & \leq \underbrace{\epsilon'_t + \alpha_{t, (i)} \cdot \mathbb{E}_{\nu^*} \left[ \langle -\tilde{Q}_{(i)}^{\pi_{\theta_t}^i, \pi_{\theta_t}^{-i}}(s, \cdot) + \lambda_i \cdot \log \pi_{\theta_t}^i(\cdot | s), \pi^i(\cdot | s) - \pi_{\theta_t}^i(\cdot | s) \rangle \right]}_{\text{(I)}} \\ & \quad + \underbrace{\alpha_{t, (i)} \cdot \mathbb{E}_{\nu^*} \left[ \langle -\tilde{Q}_{(i)}^{\pi_{\theta_t}^i, \pi_{\theta_t}^{-i}}(s, \cdot) + \tilde{Q}_{(i)}^{\pi_{\theta_t}^i, \pi_{\theta_t}^{-i}}(s, \cdot), \pi^i(\cdot | s) - \pi_{\theta_t}^i(\cdot | s) \rangle \right]}_{\text{(II)}} \\ & \quad + \underbrace{\mathbb{E}_{\nu^*} \left[ 1/2 \cdot \|\mathcal{E}_{\theta_{t+1}, (i)}(s, \cdot) - \mathcal{E}_{\theta_t, (i)}(s, \cdot)\|_{\infty}^2 \right]}_{\text{(III)}}. \end{aligned} \tag{C.4}$$



For (I), by Lemma C.3, we have

$$(I) = (1 - \gamma) \cdot [\mathcal{J}_{(i)}(\pi_{\theta_t}^i, \pi_*^{-i}) - \mathcal{J}_{(i)}(\pi_*^i, \pi_*^{-i})] - \lambda_i \cdot \mathbb{E}_{\nu^*} [\text{KL}_{t,(i)}(s)]. \quad (\text{C.5})$$

For (II), by Lemma C.2, we have

$$\begin{aligned} (II) &\leq \sqrt{2\iota_i \cdot \iota_{-i}} \cdot \left\{ \mathbb{E}_{\nu^*} [\text{KL}_{t,(i)}^{1/2}(s) \cdot \text{KL}_{t,(i)}^{1/2}(s)] \right. \\ &\quad \left. + \frac{V_{(i)}^{\max} + Q_{(i)}^{\max} \cdot \zeta}{1 - \gamma} \cdot \mathbb{E}_{\nu^*} [\text{KL}_{t,(i)}(s)]^{1/2} \cdot \mathbb{E}_{\nu^*} [\text{KL}_{t,(-i)}(s)]^{1/2} \right\} \\ &\leq \left( 1 + \frac{V_{(i)}^{\max} + Q_{(i)}^{\max} \cdot \zeta}{1 - \gamma} \right) \cdot \left( \iota_i \cdot \mathbb{E}_{\nu^*} [\text{KL}_{t,(i)}(s)] + \iota_{-i} \cdot \mathbb{E}_{\nu^*} [\text{KL}_{t,(-i)}(s)] \right). \end{aligned} \quad (\text{C.6})$$

For (III), by (4.11) of Assumption 4.4 and the definition of  $\hat{\mathcal{E}}_{t+1,(i)}$  in (3.8), we have

$$\begin{aligned} (III) &\leq \mathbb{E}_{\nu^*} \left[ \left\| \mathcal{E}_{\theta_{t+1,(i)}}(s, \cdot) - \hat{\mathcal{E}}_{t+1,(i)}(s, \cdot) \right\|_{\infty}^2 + \left\| \hat{\mathcal{E}}_{t+1,(i)}(s, \cdot) - \mathcal{E}_{\theta_{t,(i)}}(s, \cdot) \right\|_{\infty}^2 \right] \\ &\leq \epsilon_t + \alpha_{t,(i)}^2 \cdot \mathbb{E}_{\nu^*} \left[ \left\| -\lambda_i \cdot \mathcal{E}_{\theta_{t,(i)}}(s, \cdot) + \hat{Q}_{(i)}^{\pi_{\theta_t}^i, \pi_{\theta_t}^{-i}}(s, \cdot) \right\|_{\infty}^2 \right] \\ &\leq \epsilon_t + \alpha_{t,(i)}^2 \cdot \mathbb{E}_{\nu^*} \left[ 2\lambda_i^2 \cdot \left\| \mathcal{E}_{\theta_{t,(i)}}(s, \cdot) \right\|_{\infty}^2 + 2 \cdot \left\| \hat{Q}_{(i)}^{\pi_{\theta_t}^i, \pi_{\theta_t}^{-i}}(s, \cdot) \right\|_{\infty}^2 \right] \\ &\leq \epsilon_t + [2 + 2\lambda_i^2/(\lambda_i - M_i)^2] \cdot (Q_{(i)}^{\max})^2 \cdot \alpha_{t,(i)}^2. \end{aligned} \quad (\text{C.7})$$

Here the last inequality follows from the truncations  $\hat{Q}_{(i)}^{\pi_{\theta_t}^i, \pi_{\theta_t}^{-i}} \in \mathcal{F}_{Q_{(i)}^{\max}}$  and  $\mathcal{E}_{\theta_{t,(i)}} \in \mathcal{F}_{\mathcal{E}_{(i)}^{\max}}$ , where  $\mathcal{E}_{(i)}^{\max} = Q_{(i)}^{\max}/(\lambda_i - M_i)$ .

Then plugging (C.5), (C.6), and (C.7) into (C.4), we obtain

$$\begin{aligned} \mathbb{E}_{\nu^*} [\text{KL}_{t+1,(i)}(s)] &- \left\{ 1 - \left[ \lambda_i - \left( 1 + \frac{V_{(i)}^{\max} + Q_{(i)}^{\max} \cdot \zeta}{1 - \gamma} \right) \cdot \iota_i \right] \cdot \alpha_{t,(i)} \right\} \cdot \mathbb{E}_{\nu^*} [\text{KL}_{t,(i)}(s)] \\ &\leq (\epsilon_t + \epsilon'_t) + \left( 1 + \frac{V_{(i)}^{\max} + Q_{(i)}^{\max} \cdot \zeta}{1 - \gamma} \right) \cdot \iota_{-i} \cdot \alpha_{t,(i)} \cdot \mathbb{E}_{\nu^*} [\text{KL}_{t,(-i)}(s)]^{1/2} \\ &\quad + (1 - \gamma) \alpha_{t,(i)} \cdot [\mathcal{J}_{(i)}(\pi_{\theta_t}^i, \pi_*^{-i}) - \mathcal{J}_{(i)}(\pi_*^i, \pi_*^{-i})] + [2 + 2\lambda_i^2/(\lambda_i - M_i)^2] \cdot (Q_{(i)}^{\max})^2 \cdot \alpha_{t,(i)}^2. \end{aligned} \quad (\text{C.8})$$

Summing (C.8) for  $i \in \{1, 2\}$  and setting  $\alpha_{t,(1)} = \alpha_{t,(2)} = \eta_t$ , we obtain

$$\begin{aligned} (1 - \gamma) \eta_t \cdot \sum_{i \in \{1, 2\}} [\mathcal{J}_{(i)}(\pi_*^i, \pi_*^{-i}) - \mathcal{J}_{(i)}(\pi_{\theta_t}^i, \pi_*^{-i})] \\ \leq \sum_{i \in \{1, 2\}} \left\{ 1 - \left\{ \lambda_i - \left[ 2 + \frac{\sum_{i \in \{1, 2\}} (V_{(i)}^{\max} + Q_{(i)}^{\max} \cdot \zeta)}{1 - \gamma} \right] \cdot \iota_i \right\} \cdot \eta_t \right\} \cdot \mathbb{E}_{\nu^*} [\text{KL}_{t,(i)}(s)] \\ - \sum_{i \in \{1, 2\}} \mathbb{E}_{\nu^*} [\text{KL}_{t+1,(i)}(s)] + \left[ 2(\epsilon_t + \epsilon'_t) + \sum_{i \in \{1, 2\}} [2 + 2\lambda_i^2/(\lambda_i - M_i)^2] \cdot (Q_{(i)}^{\max})^2 \cdot \eta_t^2 \right] \\ = \sum_{i \in \{1, 2\}} [1 - (\lambda_i - M_i) \cdot \eta_t] \cdot \mathbb{E}_{\nu^*} [\text{KL}_{t,(i)}(s)] - \sum_{i \in \{1, 2\}} \mathbb{E}_{\nu^*} [\text{KL}_{t+1,(i)}(s)] \\ + \left\{ 2(\epsilon_t + \epsilon'_t) + \sum_{i \in \{1, 2\}} [2 + 2\lambda_i^2/(\lambda_i - M_i)^2] \cdot (Q_{(i)}^{\max})^2 \cdot \eta_t^2 \right\}. \end{aligned} \quad (\text{C.9})$$

Multiplying the both sides of (C.9) by  $t + 1$  and setting  $\eta_t = 1/[(t + 1) \cdot \min_{i \in \{1,2\}} \{\lambda_i - M_i\}]$ , we obtain for all  $0 \leq t \leq T - 1$ ,

$$\begin{aligned} & \frac{1 - \gamma}{\min_{i \in \{1,2\}} \{\lambda_i - M_i\}} \cdot \sum_{i \in \{1,2\}} [\mathcal{J}_{(i)}(\pi_*^i, \pi_*^{-i}) - \mathcal{J}_{(i)}(\pi_{\theta_t}^i, \pi_*^{-i})] \\ & \leq t \cdot \sum_{i \in \{1,2\}} \mathbb{E}_{\nu^*} [\text{KL}_{t,(i)}(s)] - (t + 1) \cdot \sum_{i \in \{1,2\}} \mathbb{E}_{\nu^*} [\text{KL}_{t+1,(i)}(s)] \\ & \quad + \left\{ 2(t + 1) \cdot (\epsilon_t + \epsilon'_t) + \frac{\sum_{i \in \{1,2\}} [2 + 2\lambda_i^2/(\lambda_i - M_i)^2] \cdot (Q_{(i)}^{\max})^2}{(t + 1) \cdot \min_{i \in \{1,2\}} \{\lambda_i - M_i\}^2} \right\}. \end{aligned} \quad (\text{C.10})$$

Telescoping (C.10) over  $0 \leq t \leq T - 1$ , by  $\sum_{t=1}^T 1/t \leq \log T$  and the nonnegativity of the KL-divergence, we obtain

$$\begin{aligned} & \frac{1 - \gamma}{T \cdot \min_{i \in \{1,2\}} \{\lambda_i - M_i\}} \cdot \sum_{t=0}^{T-1} \sum_{i \in \{1,2\}} [\mathcal{J}_{(i)}(\pi_*^i, \pi_*^{-i}) - \mathcal{J}_{(i)}(\pi_{\theta_t}^i, \pi_*^{-i})] \\ & \leq \frac{1}{T} \cdot \left\{ 2 \cdot \sum_{t=0}^{T-1} (t + 1) \cdot (\epsilon_t + \epsilon'_t) + \frac{\sum_{i \in \{1,2\}} [2 + 2\lambda_i^2/(\lambda_i - M_i)^2] \cdot (Q_{(i)}^{\max})^2}{\min_{i \in \{1,2\}} \{\lambda_i - M_i\}^2} \cdot \sum_{t=1}^T \frac{1}{t} \right\} \\ & \quad - \sum_{i \in \{1,2\}} \mathbb{E}_{\nu^*} [\text{KL}_{T,(i)}(s)] \\ & \leq \frac{2\sigma}{T} + \frac{\sum_{i \in \{1,2\}} [2 + 2\lambda_i^2/(\lambda_i - M_i)^2] \cdot (Q_{(i)}^{\max})^2}{\min_{i \in \{1,2\}} \{\lambda_i - M_i\}^2} \cdot \frac{\log T}{T}, \end{aligned} \quad (\text{C.11})$$

where  $\sigma$  is defined in (4.13). Finally, by Proposition C.1, we have

$$\sum_{i \in \{1,2\}} [\mathcal{J}_{(i)}(\pi_*^i, \pi_*^{-i}) - \mathcal{J}_{(i)}(\pi_{\theta_t}^i, \pi_*^{-i})] \geq \mathcal{J}(\pi_*^1, \pi_{\theta_t}^2) - \mathcal{J}(\pi_{\theta_t}^1, \pi_*^2) - \sum_{i \in \{1,2\}} \lambda_i \cdot \log |\mathcal{A}^i|,$$

combining which with (C.11), we obtain

$$\begin{aligned} & \frac{1}{T} \cdot \sum_{t=0}^{T-1} [\mathcal{J}(\pi_*^1, \pi_{\theta_t}^2) - \mathcal{J}(\pi_{\theta_t}^1, \pi_*^2)] \\ & \leq \frac{2\sigma \cdot \min_{i \in \{1,2\}} \{\lambda_i - M_i\}}{(1 - \gamma) \cdot T} + \frac{\sum_{i \in \{1,2\}} [2 + 2\lambda_i^2/(\lambda_i - M_i)^2] \cdot (Q_{(i)}^{\max})^2}{(1 - \gamma) \cdot \min_{i \in \{1,2\}} \{\lambda_i - M_i\}^2} \cdot \frac{\log T}{T} + \sum_{i \in \{1,2\}} \lambda_i \cdot \log |\mathcal{A}^i|. \end{aligned}$$

Thus, we conclude the proof of Theorem 4.5.  $\square$

## D PROOF OF PROPOSITION C.1

*Proof.* By the definition of  $\mathcal{J}_{(1)}(\pi^1, \pi^2)$  and  $\mathcal{J}(\pi^1, \pi^2)$ , we have

$$\begin{aligned} \mathcal{J}_{(1)}(\pi^1, \pi^2) - \mathcal{J}(\pi^1, \pi^2) &= \mathbb{E}_{\nu^*} [V_{(1)}^{\pi^1, \pi^2}(s) - V_1^{\pi^1, \pi^2}(s)] \\ &= \frac{1}{1 - \gamma} \cdot \mathbb{E}_{s' \sim \rho_{\nu^*}^{\pi^1, \pi^2}} [r_{(1)}^{\pi^1, \pi^2}(s') - r_1^{\pi^1, \pi^2}(s')] \\ &= \frac{1}{1 - \gamma} \cdot \mathbb{E}_{s' \sim \rho_{\nu^*}^{\pi^1, \pi^2}} [\lambda_1 \cdot H(\pi^1(\cdot | s))]. \end{aligned}$$

Since  $0 < H(\pi^1(\cdot | s)) \leq \log |\mathcal{A}^1|$ , we further obtain

$$\mathcal{J}(\pi^1, \pi^2) < \mathcal{J}_{(1)}(\pi^1, \pi^2) \leq \mathcal{J}(\pi^1, \pi^2) + \frac{\lambda_1 \cdot \log |\mathcal{A}^1|}{1 - \gamma},$$

which finishes the proof of (C.1). Using the same argument, we can also prove (C.2). Thus, we conclude the proof of Proposition C.1.  $\square$

## E PROOF OF LEMMA C.2

In the subsequent analysis, using the notion of the state-transition operator  $\mathcal{P}^{\pi^i, \pi^{-i}}$  in (4.7), we write  $\rho_{s, a^i, \pi^{-i}}^{\pi^i, \pi^{-i}}$ , which is defined in (4.5), as

$$\rho_{s, a^i, \pi^{-i}}^{\pi^i, \pi^{-i}} = \left[ (1 - \gamma) \cdot \sum_{t=0}^{\infty} \gamma^t \cdot (\mathcal{P}^{\pi^i, \pi^{-i}})^t \right] \circ \mathcal{P}^{a^i, \pi^{-i}} \circ \delta_s, \quad (\text{E.1})$$

where  $\delta_s$  is the Dirac delta function.

**Lemma E.1.** Under Assumption 4.3, we have

$$\left\| \sum_{t=0}^{\infty} \gamma^t \cdot [(\mathcal{P}^{\pi^i, \pi^{-i}})^t - (\mathcal{P}^{\pi^i, \pi_*^{-i}})^t] \right\|_{\text{op}} \leq \frac{\gamma \iota_i}{(1 - \gamma)^2} \cdot \mathbb{E}_{\nu^*} \left[ \text{KL}(\pi_*^{-i}(\cdot | s) \parallel \pi^{-i}(\cdot | s)) \right]^{1/2}.$$

*Proof.* Since  $\|\mathcal{P}^{\pi^i, \pi^{-i}}\|_{\text{op}} \leq 1$  (Lasota & Mackey, 2013), we have

$$\begin{aligned} & \left\| (\mathcal{P}^{\pi^i, \pi^{-i}})^t - (\mathcal{P}^{\pi^i, \pi_*^{-i}})^t \right\|_{\text{op}} \\ &= \left\| (\mathcal{P}^{\pi^i, \pi^{-i}})^{t-1} \circ (\mathcal{P}^{\pi^i, \pi^{-i}} - \mathcal{P}^{\pi^i, \pi_*^{-i}}) + [(\mathcal{P}^{\pi^i, \pi^{-i}})^{t-1} - (\mathcal{P}^{\pi^i, \pi_*^{-i}})^{t-1}] \circ \mathcal{P}^{\pi^i, \pi_*^{-i}} \right\|_{\text{op}} \\ &\leq \left\| (\mathcal{P}^{\pi^i, \pi^{-i}})^{t-1} \circ (\mathcal{P}^{\pi^i, \pi^{-i}} - \mathcal{P}^{\pi^i, \pi_*^{-i}}) \right\|_{\text{op}} + \left\| [(\mathcal{P}^{\pi^i, \pi^{-i}})^{t-1} - (\mathcal{P}^{\pi^i, \pi_*^{-i}})^{t-1}] \circ \mathcal{P}^{\pi^i, \pi_*^{-i}} \right\|_{\text{op}} \\ &\leq \|\mathcal{P}^{\pi^i, \pi^{-i}} - \mathcal{P}^{\pi^i, \pi_*^{-i}}\|_{\text{op}} + \left\| (\mathcal{P}^{\pi^i, \pi^{-i}})^{t-1} - (\mathcal{P}^{\pi^i, \pi_*^{-i}})^{t-1} \right\|_{\text{op}}. \end{aligned} \quad (\text{E.2})$$

Recursively applying (E.2) gives

$$\begin{aligned} \left\| (\mathcal{P}^{\pi^i, \pi^{-i}})^t - (\mathcal{P}^{\pi^i, \pi_*^{-i}})^t \right\|_{\text{op}} &\leq t \cdot \|\mathcal{P}^{\pi^i, \pi^{-i}} - \mathcal{P}^{\pi^i, \pi_*^{-i}}\|_{\text{op}} \\ &\leq t \cdot \iota_i \cdot \mathbb{E}_{\nu^*} \left[ \text{KL}(\pi_*^{-i}(\cdot | s) \parallel \pi^{-i}(\cdot | s))^{1/2} \right], \end{aligned}$$

where the second inequality follows from Assumption 4.3. Thus, we have

$$\begin{aligned} \left\| \sum_{t=0}^{\infty} \gamma^t \cdot [(\mathcal{P}^{\pi^i, \pi^{-i}})^t - (\mathcal{P}^{\pi^i, \pi_*^{-i}})^t] \right\|_{\text{op}} &\leq \sum_{t=0}^{\infty} \gamma^t \cdot \left\| (\mathcal{P}^{\pi^i, \pi^{-i}})^t - (\mathcal{P}^{\pi^i, \pi_*^{-i}})^t \right\|_{\text{op}} \\ &\leq \left( \sum_{t=0}^{\infty} t \gamma^t \right) \cdot \iota_i \cdot \mathbb{E}_{\nu^*} \left[ \text{KL}(\pi_*^{-i}(\cdot | s) \parallel \pi^{-i}(\cdot | s)) \right]^{1/2} \\ &= \frac{\gamma \iota_i}{(1 - \gamma)^2} \cdot \mathbb{E}_{\nu^*} \left[ \text{KL}(\pi_*^{-i}(\cdot | s) \parallel \pi^{-i}(\cdot | s)) \right]^{1/2}, \end{aligned}$$

which concludes the proof of Lemma E.1.  $\square$

Now we are ready to prove Lemma C.2.

*Proof of Lemma C.2.* By the definition of the  $Q_{(i)}$ -function in (2.5), we have

$$Q_{(i)}^{\pi^i, \pi^{-i}}(s, a^i, a^{-i}) = r_i(s, a^i, a^{-i}) + \gamma \cdot \mathbb{E}_{s' \sim \mathcal{P}(\cdot | s, a^i, a^{-i})} [V_{(i)}^{\pi^i, \pi^{-i}}(s')],$$

which gives

$$\begin{aligned}
& \left| \mathbb{E}_{\nu^*} \left[ \langle \tilde{Q}_{(i)}^{\pi^i, \pi^{-i}}(s, \cdot) - \tilde{Q}_{(i)}^{\pi^i, \pi_*^{-i}}(s, \cdot), \pi^i(\cdot | s) - \pi_*^i(\cdot | s) \rangle \right] \right| \\
&= \left| \mathbb{E}_{\nu^*} \left[ \langle r_i^{\cdot, \pi^{-i}}(s) - r_i^{\cdot, \pi_*^{-i}}(s), \pi^i(\cdot | s) - \pi_*^i(\cdot | s) \rangle \right. \right. \\
&\quad \left. \left. + \langle [\mathcal{P}^{\cdot, \pi^{-i}} \circ V_{(i)}^{\pi^i, \pi^{-i}}](s) - [\mathcal{P}^{\cdot, \pi_*^{-i}} \circ V_{(i)}^{\pi^i, \pi_*^{-i}}](s), \pi^i(\cdot | s) - \pi_*^i(\cdot | s) \rangle \right] \right| \\
&= \underbrace{\left| \mathbb{E}_{\nu^*} \left[ \langle r_i^{\cdot, \pi^{-i}}(s) - r_i^{\cdot, \pi_*^{-i}}(s), \pi^i(\cdot | s) - \pi_*^i(\cdot | s) \rangle \right] \right|}_{\text{(I)}} \\
&\quad + \underbrace{\left| \mathbb{E}_{\nu^*} \left[ \langle [\mathcal{P}^{\cdot, \pi^{-i}} \circ V_{(i)}^{\pi^i, \pi^{-i}}](s) - [\mathcal{P}^{\cdot, \pi_*^{-i}} \circ V_{(i)}^{\pi^i, \pi_*^{-i}}](s), \pi^i(\cdot | s) - \pi_*^i(\cdot | s) \rangle \right] \right|}_{\text{(II)}}.
\end{aligned} \tag{E.3}$$

**Upper Bounding (I):** By the Cauchy-Schwartz inequality, we have

$$\begin{aligned}
\text{(I)} &\leq \mathbb{E}_{\nu^*} \left[ \|r_i^{\cdot, \pi^{-i}}(s) - r_i^{\cdot, \pi_*^{-i}}(s)\|_{\infty} \cdot \|\pi^i(\cdot | s) - \pi_*^i(\cdot | s)\|_1 \right] \\
&\leq \sqrt{2} \cdot \iota_i \cdot \mathbb{E}_{\nu^*} \left[ \text{KL}(\pi_*^i(\cdot | s) \| \pi^{-i}(\cdot | s))^{1/2} \cdot \text{KL}(\pi_*^i(\cdot | s) \| \pi^i(\cdot | s))^{1/2} \right],
\end{aligned} \tag{E.4}$$

where the second inequality follows from Assumption 4.3 and the Pinsker's inequality. Meanwhile, we have

$$\begin{aligned}
\text{(I)} &= \left| \mathbb{E}_{\nu^*} \left[ \langle r_i^{\pi^i, \cdot}(s) - r_i^{\pi_*^i, \cdot}(s), \pi^{-i}(\cdot | s) - \pi_*^{-i}(\cdot | s) \rangle \right] \right| \\
&\leq \sqrt{2} \cdot \iota_{-i} \cdot \mathbb{E}_{\nu^*} \left[ \text{KL}(\pi_*^i(\cdot | s) \| \pi^i(\cdot | s))^{1/2} \cdot \text{KL}(\pi_*^{-i}(\cdot | s) \| \pi^{-i}(\cdot | s))^{1/2} \right],
\end{aligned} \tag{E.5}$$

where the inequality follows from the same argument as (E.4). Combining (E.4) and (E.5), we obtain

$$\text{(I)} \leq \sqrt{2\iota_i \cdot \iota_{-i}} \cdot \mathbb{E}_{\nu^*} \left[ \text{KL}(\pi_*^i(\cdot | s) \| \pi^i(\cdot | s))^{1/2} \cdot \text{KL}(\pi_*^{-i}(\cdot | s) \| \pi^{-i}(\cdot | s))^{1/2} \right]. \tag{E.6}$$

**Upper Bounding (II):** Recall that we have

$$\begin{aligned}
V_{(i)}^{\pi^i, \pi^{-i}}(s) &= \frac{1}{1-\gamma} \cdot \mathbb{E}_{s' \sim \rho_{s, a^i, \pi^{-i}}} \left[ r_{(i)}^{\pi^i, \pi^{-i}}(s') \right] \\
&= \frac{1}{1-\gamma} \cdot \mathbb{E}_{s' \sim \rho_{s, a^i, \pi^{-i}}} \left[ r_i^{\pi^i, \pi^{-i}}(s') + \lambda_i \cdot H(\pi^i(\cdot | s')) \right],
\end{aligned}$$

which gives

$$\begin{aligned}
& (1-\gamma) \cdot \left| [\mathcal{P}^{a^i, \pi^{-i}} \circ V_{(i)}^{\pi^i, \pi^{-i}}](s) - [\mathcal{P}^{a^i, \pi_*^{-i}} \circ V_{(i)}^{\pi^i, \pi_*^{-i}}](s) \right| \\
&= \left| \mathbb{E}_{s' \sim \rho_{s, a^i, \pi^{-i}}} \left[ r_i^{\pi^i, \pi^{-i}}(s') + \lambda_i \cdot H(\pi^i(\cdot | s')) \right] - \mathbb{E}_{s' \sim \rho_{s, a^i, \pi_*^{-i}}} \left[ r_i^{\pi^i, \pi_*^{-i}}(s') + \lambda_i \cdot H(\pi^i(\cdot | s')) \right] \right| \\
&\leq \left| \mathbb{E}_{s' \sim \rho_{s, a^i, \pi^{-i}}} \left[ r_i^{\pi^i, \pi^{-i}}(s') + \lambda_i \cdot H(\pi^i(\cdot | s')) \right] - \mathbb{E}_{s' \sim \rho_{s, a^i, \pi_*^{-i}}} \left[ r_i^{\pi^i, \pi^{-i}}(s') + \lambda_i \cdot H(\pi^i(\cdot | s')) \right] \right| \\
&\quad + \iota_i \cdot \mathbb{E}_{s' \sim \rho_{s, a^i, \pi_*^{-i}}} \left[ \|\pi^{-i}(\cdot | s') - \pi_*^{-i}(\cdot | s')\|_1 \right] \\
&\leq \underbrace{(1 + \lambda_i \cdot \log |\mathcal{A}^i|) \cdot \|\rho_{s, a^i, \pi^{-i}}^{\pi^i, \pi^{-i}} - \rho_{s, a^i, \pi_*^{-i}}^{\pi^i, \pi_*^{-i}}\|_{L_1(S)}}_{\text{(III)}} + \underbrace{\iota_i \cdot \mathbb{E}_{s' \sim \rho_{s, a^i, \pi_*^{-i}}} \left[ \text{KL}(\pi_*^{-i}(\cdot | s') \| \pi^{-i}(\cdot | s'))^{1/2} \right]}_{\text{(IV)}},
\end{aligned} \tag{E.7}$$

where the first inequality follows from (4.9) of Assumption 4.3, and  $\rho_{s, a^i, \pi^{-i}}^{\pi^i, \pi^{-i}}$  is defined in (4.5).

By (E.1), we have

$$\begin{aligned}
(\text{III}) &= (1 - \gamma) \cdot \left\| \left[ \sum_{t=0}^{\infty} \gamma^t \cdot (\mathcal{P}^{\pi^i, \pi^{-i}})^t \right] \circ \mathcal{P}^{a^i, \pi^{-i}} \circ \delta_s - \left[ \sum_{t=0}^{\infty} \gamma^t \cdot (\mathcal{P}^{\pi^i, \pi_*^{-i}})^t \right] \circ \mathcal{P}^{a^i, \pi_*^{-i}} \circ \delta_s \right\|_{L_1(S)} \\
&\leq (1 - \gamma) \cdot \left\| \left[ \sum_{t=0}^{\infty} \gamma^t \cdot [(\mathcal{P}^{\pi^i, \pi^{-i}})^t - (\mathcal{P}^{\pi^i, \pi_*^{-i}})^t] \right] \circ \mathcal{P}^{a^i, \pi^{-i}} \circ \delta_s \right\|_{L_1(S)} \\
&\quad + \left\| \left[ (1 - \gamma) \cdot \sum_{t=0}^{\infty} \gamma^t \cdot (\mathcal{P}^{\pi^i, \pi^{-i}})^t \right] \circ (\mathcal{P}^{a^i, \pi^{-i}} - \mathcal{P}^{a^i, \pi_*^{-i}}) \circ \delta_s \right\|_{L_1(S)}. \tag{E.8}
\end{aligned}$$

Since  $\|\mathcal{P}^{\pi^i, \pi^{-i}}\|_{\text{op}} \leq 1$ , we have

$$\left\| (1 - \gamma) \cdot \sum_{t=0}^{\infty} \gamma^t \cdot (\mathcal{P}^{\pi^i, \pi^{-i}})^t \right\|_{\text{op}} \leq (1 - \gamma) \cdot \sum_{t=0}^{\infty} \gamma^t \cdot \|\mathcal{P}^{\pi^i, \pi^{-i}}\|_{\text{op}}^t \leq 1,$$

plugging which and Lemma E.1 into (E.8) gives

$$\begin{aligned}
(\text{III}) &\leq (1 - \gamma) \cdot \left\| \sum_{t=0}^{\infty} \gamma^t \cdot [(\mathcal{P}^{\pi^i, \pi^{-i}})^t - (\mathcal{P}^{\pi^i, \pi_*^{-i}})^t] \right\|_{\text{op}} \cdot \|\mathcal{P}^{a^i, \pi^{-i}}\|_{\text{op}} \cdot \|\delta_s\|_{L_1(S)} \\
&\quad + \left\| (1 - \gamma) \cdot \sum_{t=0}^{\infty} \gamma^t \cdot (\mathcal{P}^{\pi^i, \pi^{-i}})^t \right\| \cdot \|\mathcal{P}^{a^i, \pi^{-i}} - \mathcal{P}^{a^i, \pi_*^{-i}}\|_{\text{op}} \cdot \|\delta_s\|_{L_1(S)} \\
&\leq \frac{\ell_i}{1 - \gamma} \cdot \mathbb{E}_{\nu^*} \left[ \text{KL}(\pi_*^{-i}(\cdot | s) \| \pi^{-i}(\cdot | s)) \right]^{1/2}. \tag{E.9}
\end{aligned}$$

By the Cauchy-Schwartz inequality, we have

$$\begin{aligned}
(\text{IV}) &= \mathbb{E}_{s' \sim \nu^*} \left[ \frac{d\rho_{s, a^i, \pi_*^{-i}}^{\pi^i, \pi^{-i}}}{d\nu^*} \cdot \text{KL}(\pi_*^{-i}(\cdot | s) \| \pi^{-i}(\cdot | s))^{1/2} \right] \\
&\leq \mathbb{E}_{\nu^*} \left[ \left| \frac{d\rho_{s, a^i, \pi_*^{-i}}^{\pi^i, \pi^{-i}}}{d\nu^*} \right|^2 \right]^{1/2} \cdot \mathbb{E}_{s' \sim \nu^*} \left[ \text{KL}(\pi_*^{-i}(\cdot | s') \| \pi^{-i}(\cdot | s')) \right]^{1/2} \\
&\leq \zeta \cdot \mathbb{E}_{\nu^*} \left[ \text{KL}(\pi_*^{-i}(\cdot | s) \| \pi^{-i}(\cdot | s)) \right]^{1/2}, \tag{E.10}
\end{aligned}$$

where the last inequality follows from Assumption 4.2 and the Pinsker's inequality. Plugging (E.9) and (E.10) into (E.7), we obtain for all  $s \in \mathcal{S}$  and  $a^i \in \mathcal{A}^i$  that,

$$\begin{aligned}
&|[\mathcal{P}^{a^i, \pi^{-i}} \circ V_{(i)}^{\pi^i, \pi^{-i}}](s) - [\mathcal{P}^{a^i, \pi_*^{-i}} \circ V_{(i)}^{\pi^i, \pi_*^{-i}}](s)| \\
&\leq \frac{V_{(i)}^{\max} + \zeta}{1 - \gamma} \cdot \ell_i \cdot \mathbb{E}_{\nu^*} \left[ \text{KL}(\pi_*^{-i}(\cdot | s) \| \pi^{-i}(\cdot | s)) \right]^{1/2},
\end{aligned}$$

which further gives

$$\begin{aligned}
(\text{II}) &\leq \mathbb{E}_{\nu^*} \left[ \left\| [\mathcal{P}^{\cdot, \pi^{-i}} \circ V_{(i)}^{\pi^i, \pi^{-i}}](s) - [\mathcal{P}^{\cdot, \pi_*^{-i}} \circ V_{(i)}^{\pi^i, \pi_*^{-i}}](s) \right\|_{\infty} \cdot \left\| \pi^i(\cdot | s) - \pi_*^i(\cdot | s) \right\|_1 \right] \tag{E.11} \\
&\leq \frac{V_{(i)}^{\max} + \zeta}{1 - \gamma} \cdot \ell_i \cdot \mathbb{E}_{\nu^*} \left[ \text{KL}(\pi_*^{-i}(\cdot | s) \| \pi^{-i}(\cdot | s)) \right]^{1/2} \cdot \mathbb{E}_{\nu^*} \left[ \left\| \pi^i(\cdot | s) - \pi_*^i(\cdot | s) \right\|_1 \right] \\
&\leq \frac{\sqrt{2} \cdot (V_{(i)}^{\max} + \zeta) \cdot \ell_i}{1 - \gamma} \cdot \mathbb{E}_{\nu^*} \left[ \text{KL}(\pi_*^{-i}(\cdot | s) \| \pi^{-i}(\cdot | s)) \right]^{1/2} \cdot \mathbb{E}_{\nu^*} \left[ \text{KL}(\pi_*^i(\cdot | s) \| \pi^i(\cdot | s)) \right]^{1/2},
\end{aligned}$$

where the first inequality follows from the Cauchy-Schwartz inequality and the last inequality follows from the Pinsker's inequality. Alternatively, we can also write

$$\begin{aligned}
(\text{II}) &= \left| \mathbb{E}_{\nu^*} \left[ \left\langle [(\mathcal{P}^{\pi^i, \cdot} - \mathcal{P}^{\pi_*^i, \cdot}) \circ V_{(i)}^{\pi^i, \pi^{-i}}](s), \pi^{-i}(\cdot | s) - \pi_*^{-i}(\cdot | s) \right\rangle \right] \right. \\
&\quad \left. + \mathbb{E}_{\nu^*} \left[ \left\langle [\mathcal{P}^{\cdot, \pi_*^{-i}} \circ (V_{(i)}^{\pi^i, \pi^{-i}} - V_{(i)}^{\pi_*^i, \pi_*^{-i}})](s), \pi^i(\cdot | s) - \pi_*^i(\cdot | s) \right\rangle \right] \right| \\
&\leq \underbrace{\left| \mathbb{E}_{\nu^*} \left[ \left\langle [(\mathcal{P}^{\pi^i, \cdot} - \mathcal{P}^{\pi_*^i, \cdot}) \circ V_{(i)}^{\pi^i, \pi^{-i}}](s), \pi^{-i}(\cdot | s) - \pi_*^{-i}(\cdot | s) \right\rangle \right] \right|}_{(\text{V})} \\
&\quad + \underbrace{\left| \mathbb{E}_{\nu^*} \left[ \left\langle [(\mathcal{P}^{\pi^i, \pi_*^{-i}} - \mathcal{P}^{\pi_*^i, \pi_*^{-i}}) \circ (V_{(i)}^{\pi^i, \pi^{-i}} - V_{(i)}^{\pi_*^i, \pi_*^{-i}})](s), \pi^i(\cdot | s) - \pi_*^i(\cdot | s) \right\rangle \right] \right|}_{(\text{VI})}. \tag{E.12}
\end{aligned}$$

By (4.8) of Assumption 4.3, we have for all  $s \in \mathcal{S}$  and  $a^{-i} \in \mathcal{A}^{-i}$  that,

$$\begin{aligned}
\left| [(\mathcal{P}^{\pi^i, a^{-i}} - \mathcal{P}^{\pi_*^i, a^{-i}}) \circ V_{(i)}^{\pi^i, \pi^{-i}}](s) \right| &\leq V_{(i)}^{\max} \cdot \|\mathcal{P}^{\pi^i, a^{-i}} - \mathcal{P}^{\pi_*^i, a^{-i}}\|_{\text{op}} \\
&\leq V_{(i)}^{\max} \cdot \iota_{-i} \cdot \mathbb{E}_{\nu^*} \left[ \text{KL}(\pi_*^i(\cdot | s) \parallel \pi^i(\cdot | s)) \right]^{1/2},
\end{aligned}$$

which gives

$$\begin{aligned}
(\text{V}) &\leq \mathbb{E}_{\nu^*} \left[ \left\| [(\mathcal{P}^{\pi^i, \cdot} - \mathcal{P}^{\pi_*^i, \cdot}) \circ V_{(i)}^{\pi^i, \pi^{-i}}](s) \right\|_{\infty} \cdot \|\pi^{-i}(\cdot | s) - \pi_*^{-i}(\cdot | s)\|_1 \right] \tag{E.13} \\
&\leq \sqrt{2} \cdot V_{(i)}^{\max} \cdot \iota_{-i} \cdot \mathbb{E}_{\nu^*} \left[ \text{KL}(\pi_*^i(\cdot | s) \parallel \pi^i(\cdot | s)) \right]^{1/2} \cdot \mathbb{E}_{\nu^*} \left[ \text{KL}(\pi_*^{-i}(\cdot | s) \parallel \pi^{-i}(\cdot | s)) \right]^{1/2} \\
&\leq \frac{\sqrt{2} \cdot V_{(i)}^{\max}}{1 - \gamma} \cdot \iota_{-i} \cdot \mathbb{E}_{\nu^*} \left[ \text{KL}(\pi_*^i(\cdot | s) \parallel \pi^i(\cdot | s)) \right]^{1/2} \cdot \mathbb{E}_{\nu^*} \left[ \text{KL}(\pi_*^{-i}(\cdot | s) \parallel \pi^{-i}(\cdot | s)) \right]^{1/2}.
\end{aligned}$$

Here the second inequality follows from the Pinsker's inequality.

Meanwhile, we have

$$\begin{aligned}
(\text{VI}) &\leq \mathbb{E}_{\nu^*} \left[ \left\| [(\mathcal{P}^{\pi^i, \pi_*^{-i}} - \mathcal{P}^{\pi_*^i, \pi_*^{-i}}) \circ (V_{(i)}^{\pi^i, \pi^{-i}} - V_{(i)}^{\pi_*^i, \pi_*^{-i}})](s) \right\| \right] \tag{E.14} \\
&\leq \|\mathcal{P}^{\pi^i, \pi_*^{-i}} - \mathcal{P}^{\pi_*^i, \pi_*^{-i}}\|_{\text{op}} \cdot \mathbb{E}_{\nu^*} \left[ |V_{(i)}^{\pi^i, \pi^{-i}}(s) - V_{(i)}^{\pi_*^i, \pi_*^{-i}}(s)| \right] \\
&\leq \iota_{-i} \cdot \mathbb{E}_{\nu^*} \left[ \text{KL}(\pi_*^i(\cdot | s) \parallel \pi^i(\cdot | s)) \right]^{1/2} \cdot \mathbb{E}_{\nu^*} \left[ |V_{(i)}^{\pi^i, \pi^{-i}}(s) - V_{(i)}^{\pi_*^i, \pi_*^{-i}}(s)| \right].
\end{aligned}$$

By the same argument in the proof of Lemma C.3, we have

$$V_{(i)}^{\pi^i, \pi^{-i}}(s) - V_{(i)}^{\pi_*^i, \pi_*^{-i}}(s) = \frac{1}{1 - \gamma} \cdot \mathbb{E}_{s' \sim \rho_{\nu^*, \pi_*^i, \pi_*^{-i}}} \left[ \langle \tilde{Q}_{(i)}^{\pi^i, \pi^{-i}}(s', \cdot), \pi_*^{-i}(\cdot | s') - \pi^{-i}(\cdot | s') \rangle \right],$$

which gives

$$\begin{aligned}
\mathbb{E}_{\nu^*} \left[ |V_{(i)}^{\pi^i, \pi^{-i}}(s) - V_{(i)}^{\pi_*^i, \pi_*^{-i}}(s)| \right] &\leq \frac{1}{1 - \gamma} \cdot \mathbb{E}_{s' \sim \rho_{\nu^*, \pi_*^i, \pi_*^{-i}}} \left[ \|\tilde{Q}_{(i)}^{\pi^i, \pi^{-i}}(s', \cdot)\|_{\infty} \cdot \|\pi_*^{-i}(\cdot | s') - \pi^{-i}(\cdot | s')\|_1 \right] \\
&\leq \frac{Q_{(i)}^{\max}}{1 - \gamma} \cdot \mathbb{E}_{s' \sim \rho_{\nu^*, \pi_*^i, \pi_*^{-i}}} \left[ \|\pi_*^{-i}(\cdot | s') - \pi^{-i}(\cdot | s')\|_1 \right] \\
&\leq \frac{\sqrt{2} \cdot Q_{(i)}^{\max} \cdot \zeta}{1 - \gamma} \cdot \mathbb{E}_{\nu^*} \left[ \text{KL}(\pi_*^{-i}(\cdot | s) \parallel \pi^{-i}(\cdot | s)) \right]^{1/2}, \tag{E.15}
\end{aligned}$$

where the last inequality follows from the same arguments in (E.10). Taking (E.15) into (E.14), we obtain

$$(\text{VI}) \leq \frac{\sqrt{2} \cdot Q_{(i)}^{\max} \cdot \zeta}{1 - \gamma} \cdot \iota_{-i} \cdot \mathbb{E}_{\nu^*} \left[ \text{KL}(\pi_*^i(\cdot | s) \parallel \pi^i(\cdot | s)) \right]^{1/2} \cdot \mathbb{E}_{\nu^*} \left[ \text{KL}(\pi_*^{-i}(\cdot | s) \parallel \pi^{-i}(\cdot | s)) \right]^{1/2},$$

pugging which and (E.13) into (E.12) gives

$$(II) \leq \frac{\sqrt{2} \cdot (V_{(i)}^{\max} + Q_{(i)}^{\max} \cdot \zeta)}{1 - \gamma} \cdot \iota_{-i} \cdot \mathbb{E}_{\nu^*} \left[ \text{KL}(\pi_*^i(\cdot | s) \| \pi^i(\cdot | s)) \right]^{1/2} \cdot \mathbb{E}_{\nu^*} \left[ \text{KL}(\pi_*^{-i}(\cdot | s) \| \pi^{-i}(\cdot | s)) \right]^{1/2}. \quad (\text{E.16})$$

Combining (E.11) and (E.16), we obtain

$$(II) \leq \frac{V_{(i)}^{\max} + Q_{(i)}^{\max} \cdot \zeta}{1 - \gamma} \cdot \sqrt{2\iota_i \cdot \iota_{-i}} \cdot \mathbb{E}_{\nu^*} \left[ \text{KL}(\pi_*^i(\cdot | s) \| \pi^i(\cdot | s)) \right]^{1/2} \cdot \mathbb{E}_{\nu^*} \left[ \text{KL}(\pi_*^{-i}(\cdot | s) \| \pi^{-i}(\cdot | s)) \right]^{1/2}. \quad (\text{E.17})$$

Finally, taking (E.6) and (E.17) in to (E.3), we obtain

$$\begin{aligned} & \left| \mathbb{E}_{\nu^*} \left[ \langle \tilde{Q}_{(i)}^{\pi^i, \pi^{-i}}(s, \cdot) - \tilde{Q}_{(i)}^{\pi^i, \pi_*^{-i}}(s, \cdot), \pi^i(\cdot | s) - \pi_*^i(\cdot | s) \rangle \right] \right| \\ & \leq \sqrt{2\iota_i \cdot \iota_{-i}} \cdot \left\{ \mathbb{E}_{\nu^*} \left[ \text{KL}(\pi_*^i(\cdot | s) \| \pi^i(\cdot | s))^{1/2} \cdot \text{KL}(\pi_*^{-i}(\cdot | s) \| \pi^{-i}(\cdot | s))^{1/2} \right] \right. \\ & \quad \left. + \frac{V_{(i)}^{\max} + Q_{(i)}^{\max} \cdot \zeta}{1 - \gamma} \cdot \mathbb{E}_{\nu^*} \left[ \text{KL}(\pi_*^i(\cdot | s) \| \pi^i(\cdot | s)) \right]^{1/2} \cdot \mathbb{E}_{\nu^*} \left[ \text{KL}(\pi_*^{-i}(\cdot | s) \| \pi^{-i}(\cdot | s)) \right]^{1/2} \right\}, \end{aligned}$$

which concludes the proof of Lemma C.2.  $\square$

## F PROOF OF LEMMA C.3

*Proof.* The proof extends that of Lemma 6.1 in Kakade & Langford (2002) to zero-sum Markov games. By the definition of  $V_{(i)}^{\pi^i, \pi^{-i}}(s)$  in (2.1), we have

$$\begin{aligned} & V_{(i)}^{\pi^i, \pi^{-i}}(s) \\ & = \mathbb{E}_{\pi_*^i, \pi_*^{-i}} \left[ \sum_{t=0}^{\infty} \gamma^t \cdot (r_{(i)}^{\pi_*^i, \pi_*^{-i}}(s_t, a^i, a^{-i}) + V_{(i)}^{\pi^i, \pi_*^{-i}}(s_t) - V_{(i)}^{\pi^i, \pi_*^{-i}}(s_t)) \mid s_0 = s \right] \\ & = \mathbb{E}_{\pi_*^i, \pi_*^{-i}} \left[ \sum_{t=0}^{\infty} \gamma^t \cdot (r_{(i)}^{\pi_*^i, \pi_*^{-i}}(s_t, a^i, a^{-i}) + \gamma \cdot V_{(i)}^{\pi^i, \pi_*^{-i}}(s_{t+1}) - V_{(i)}^{\pi^i, \pi_*^{-i}}(s_t)) \mid s_0 = s \right] + V_{(i)}^{\pi^i, \pi_*^{-i}}(s). \end{aligned} \quad (\text{F.1})$$

By the definition of  $Q_{(i)}$ -function, we have

$$Q_{(i)}^{\pi^i, \pi_*^{-i}}(s, a^i, a^{-i}) = r(s, a^i, a^{-i}) + \gamma \cdot \mathbb{E}_{s' \sim \mathcal{P}(\cdot | s, a^i, a^{-i})} [V_{(i)}^{\pi^i, \pi_*^{-i}}(s')],$$

which gives

$$\begin{aligned} & \mathbb{E}_{\pi_*^i, \pi_*^{-i}} \left[ r_{(i)}^{\pi_*^i, \pi_*^{-i}}(s) + \gamma \cdot \mathbb{E}_{s' \sim \mathcal{P}(\cdot | s, a^i, a^{-i})} [V_{(i)}^{\pi^i, \pi_*^{-i}}(s')] - V_{(i)}^{\pi^i, \pi_*^{-i}}(s) \right] \\ & = \mathbb{E}_{\pi_*^i, \pi_*^{-i}} \left[ r(s, a^i, a^{-i}) - \lambda_i \cdot \log \pi_*^i(a^i | s) + \gamma \cdot \mathbb{E}_{s' \sim \mathcal{P}(\cdot | s, a^i, a^{-i})} [V_{(i)}^{\pi^i, \pi_*^{-i}}(s')] - V_{(i)}^{\pi^i, \pi_*^{-i}}(s) \right] \\ & = \mathbb{E}_{\pi_*^i, \pi_*^{-i}} [Q_{(i)}^{\pi^i, \pi_*^{-i}}(s, a^i, a^{-i}) - V_{(i)}^{\pi^i, \pi_*^{-i}}(s)] + \lambda_i \cdot H(\pi_*^i(\cdot | s)) \\ & = \langle \tilde{Q}_{(i)}^{\pi^i, \pi_*^{-i}}(s, \cdot), \pi_*^i(\cdot | s) - \pi^i(\cdot | s) \rangle + \lambda_i \cdot H(\pi_*^i(\cdot | s)) - \lambda_i \cdot H(\pi^i(\cdot | s)). \end{aligned} \quad (\text{F.2})$$

Here the last equality follows from

$$\begin{aligned} V_{(i)}^{\pi^i, \pi_*^{-i}}(s) & = \mathbb{E}_{\pi^i, \pi_*^{-i}} [Q_{(i)}^{\pi^i, \pi_*^{-i}}(s, a^i, a^{-i}) - \lambda_i \cdot \log \pi^i(a^i | s)] \\ & = \langle \tilde{Q}_{(i)}^{\pi^i, \pi_*^{-i}}(s, \cdot), \pi^i(\cdot | s) \rangle + \lambda_i \cdot H(\pi^i(\cdot | s)). \end{aligned}$$

For the entropy terms in (F.2), we have

$$\begin{aligned} H(\pi_*^i(\cdot | s)) & = \langle -\log \pi_*^i(\cdot | s), \pi_*^i(\cdot | s) \rangle \\ & = \langle -\log \pi^i(\cdot | s), \pi_*^i(\cdot | s) \rangle - \langle \log(\pi_*^i(\cdot | s)/\pi^i(\cdot | s)), \pi_*^i(\cdot | s) \rangle \\ & = \langle -\log \pi^i(\cdot | s), \pi_*^i(\cdot | s) \rangle - \text{KL}(\pi_*^i(\cdot | s) \| \pi^i(\cdot | s)), \end{aligned}$$

which gives

$$\begin{aligned} & H(\pi_*^i(\cdot | s)) - H(\pi^i(\cdot | s)) \\ &= \langle -\log \pi^i(\cdot | s), \pi_*^i(\cdot | s) - \pi^i(\cdot | s) \rangle - \text{KL}(\pi_*^i(\cdot | s) \| \pi^i(\cdot | s)). \end{aligned} \quad (\text{F.3})$$

Taking (F.2) and (F.3) into (F.1), we have

$$\begin{aligned} & V_{(i)}^{\pi_*^i, \pi_*^{-i}}(s) - V_{(i)}^{\pi^i, \pi^{-i}}(s) \\ &= \mathbb{E}_{\pi_*^i, \pi_*^{-i}} \left[ \sum_{t=0}^{\infty} \gamma^t \cdot \left( \langle \tilde{Q}_{(i)}^{\pi_*^i, \pi_*^{-i}}(s_t, \cdot) - \lambda_i \cdot \log \pi^i(\cdot | s_t), \pi_*^i(\cdot | s_t) - \pi^i(\cdot | s_t) \rangle \right. \right. \\ &\quad \left. \left. - \lambda_i \cdot \text{KL}(\pi_*^i(\cdot | s_t) \| \pi^i(\cdot | s_t)) \right) \middle| s_0 = s \right] \\ &= \frac{1}{1-\gamma} \cdot \mathbb{E}_{s' \sim \rho_{s'}^{\pi_*^i, \pi_*^{-i}}} \left[ \langle \tilde{Q}_{(i)}^{\pi_*^i, \pi_*^{-i}}(s', \cdot) - \lambda_i \cdot \log \pi^i(\cdot | s'), \pi_*^i(\cdot | s') - \pi^i(\cdot | s') \rangle \right. \\ &\quad \left. - \lambda_i \cdot \text{KL}(\pi_*^i(\cdot | s') \| \pi^i(\cdot | s')) \right], \end{aligned} \quad (\text{F.4})$$

where  $\rho_{s'}^{\pi_*^i, \pi_*^{-i}}$  is defined in (4.4) as the visitation measure of the policy pair  $[\pi_*^i; \pi_*^{-i}]$  starting from state  $s$ . Taking  $\mathbb{E}_{\nu^*}[\cdot]$  on both sides of (F.4) and recalling the definition of  $\mathcal{J}_{(i)}(\pi^i, \pi^{-i})$  in (4.3), we have

$$\begin{aligned} & \mathcal{J}_{(i)}(\pi_*^i, \pi_*^{-i}) - \mathcal{J}_{(i)}(\pi^i, \pi^{-i}) + \frac{\lambda_i}{1-\gamma} \cdot \mathbb{E}_{\nu^*} [\text{KL}(\pi_*^i(\cdot | s) \| \pi^i(\cdot | s))] \\ &= \frac{1}{1-\gamma} \cdot \mathbb{E}_{\nu^*} [\langle \tilde{Q}_{(i)}^{\pi_*^i, \pi_*^{-i}}(s, \cdot) - \lambda_i \cdot \log \pi^i(\cdot | s), \pi_*^i(\cdot | s) - \pi^i(\cdot | s) \rangle]. \end{aligned}$$

Here we use the fact that  $\mathbb{E}_{s' \sim \nu^*}[\cdot] = \mathbb{E}_{s' \sim \rho_{s'}^{\pi_*^i, \pi_*^{-i}}, s \sim \nu^*}[\cdot]$ . Thus, we finish the proof of Lemma C.3.  $\square$

## G PROOF OF LEMMA C.4

*Proof.* First, we have for any  $s \in \mathcal{S}$  that,

$$\begin{aligned} & \text{KL}(\pi_*^i(\cdot | s) \| \pi_{\theta_t}^i(\cdot | s)) - \text{KL}(\pi_*^i(\cdot | s) \| \pi_{\theta_{t+1}}^i(\cdot | s)) \\ &= \text{KL}(\pi_{\theta_{t+1}}^i(\cdot | s) \| \pi_{\theta_t}^i(\cdot | s)) + \left\langle \log \left[ \frac{\pi_{\theta_{t+1}}^i(\cdot | s)}{\pi_{\theta_t}^i(\cdot | s)} \right], \pi_{\theta_t}^i(\cdot | s) - \pi_{\theta_{t+1}}^i(\cdot | s) \right\rangle \\ &\quad + \left\langle \log \left[ \frac{\pi_{\theta_{t+1}}^i(\cdot | s)}{\pi_{\theta_t}^i(\cdot | s)} \right], \pi_*^i(\cdot | s) - \pi_{\theta_t}^i(\cdot | s) \right\rangle \\ &= \text{KL}(\pi_{\theta_{t+1}}^i(\cdot | s) \| \pi_{\theta_t}^i(\cdot | s)) + \left\langle \log \left[ \frac{\pi_{\theta_{t+1}}^i(\cdot | s)}{\pi_{\theta_t}^i(\cdot | s)} \right], \pi_{\theta_t}^i(\cdot | s) - \pi_{\theta_{t+1}}^i(\cdot | s) \right\rangle \\ &\quad + \left\langle \log \left[ \frac{\pi_{\theta_{t+1}}^i(\cdot | s)}{\pi_{\theta_t}^i(\cdot | s)} \right] - \alpha_{t,(i)} \cdot (\tilde{Q}_{(i)}^{\pi_{\theta_t}^i, \pi_{\theta_t}^{-i}}(s, \cdot) - \lambda_i \cdot \log \pi_{\theta_t}^i(\cdot | s)), \pi_*^i(\cdot | s) - \pi_{\theta_t}^i(\cdot | s) \right\rangle \\ &\quad + \alpha_{t,(i)} \cdot \langle \tilde{Q}_{(i)}^{\pi_{\theta_t}^i, \pi_{\theta_t}^{-i}}(s, \cdot) - \lambda_i \cdot \log \pi_{\theta_t}^i(\cdot | s), \pi_*^i(\cdot | s) - \pi_{\theta_t}^i(\cdot | s) \rangle. \end{aligned} \quad (\text{G.1})$$

Recall that

$$\begin{aligned} \pi_{\theta_{t+1}}^i(\cdot | s) &\propto \exp\{(1 - \lambda_i \alpha_{t,(i)}) \cdot \mathcal{E}_{\theta_t,(i)}(s, \cdot) + \alpha_{t,(i)} \cdot \tilde{Q}_{(i)}^{\pi_{\theta_t}^i, \pi_{\theta_t}^{-i}}(s, \cdot)\} \\ &\propto \exp\{\mathcal{E}_{\theta_t,(i)}(s, \cdot) + \alpha_{t,(i)} \cdot (\tilde{Q}_{(i)}^{\pi_{\theta_t}^i, \pi_{\theta_t}^{-i}}(s, \cdot) - \lambda_i \cdot \log \pi_{\theta_t}^i(\cdot | s))\}. \end{aligned}$$

Let

$$Z_{t+1,(i)}(s) = \sum_{a^i \in \mathcal{A}^i} \exp\{\mathcal{E}_{\theta_t,(i)}(s, a^i) + \alpha_{t,(i)} \cdot (\tilde{Q}_{(i)}^{\pi_{\theta_t}^i, \pi_{\theta_t}^{-i}}(s, a^i) - \lambda_i \cdot \log \pi_{\theta_t}^i(a^i | s))\},$$



and

$$Z_{\theta_t, (i)}(s) = \sum_{a^i \in \mathcal{A}^i} \exp\{\mathcal{E}_{\theta_{t+1}, (i)}(s, a^i)\}.$$

where are only dependent on the state  $s$ . It can be verified that  $\langle \log Z_{\theta_t, (i)}(s), \pi^i(\cdot | s) - \pi^{i'}(\cdot | s) \rangle = \langle \log Z_{t, (i)}(s), \pi^i(\cdot | s) - \pi^{i'}(\cdot | s) \rangle = 0$  for all  $t$ ,  $\pi^i$ , and  $\pi^{i'}$ , which implies that, on the right-hand-side of (G.1),

$$\begin{aligned} & \left\langle \log \pi_{\theta_t}^i(\cdot | s) + \alpha_{t, (i)} \cdot (\tilde{Q}_{(i)}^{\pi_{\theta_t}^i, \pi_{\theta_t}^{-i}}(s, \cdot) - \lambda_i \cdot \log \pi_{\theta_t}^i(\cdot | s)), \pi_*^i(\cdot | s) - \pi_{\theta_t}^i(\cdot | s) \right\rangle \\ &= \left\langle \mathcal{E}_{\theta_t, (i)}(s, \cdot) - \log Z_{\theta_t, (i)}(s) + \alpha_{t, (i)} \cdot (\tilde{Q}_{(i)}^{\pi_{\theta_t}^i, \pi_{\theta_t}^{-i}}(s, \cdot) - \lambda_i \cdot \log \pi_{\theta_t}^i(\cdot | s)), \pi_*^i(\cdot | s) - \pi_{\theta_t}^i(\cdot | s) \right\rangle \\ &= \left\langle \mathcal{E}_{\theta_t, (i)}(s, \cdot) + \alpha_{t, (i)} \cdot (\tilde{Q}_{(i)}^{\pi_{\theta_t}^i, \pi_{\theta_t}^{-i}}(s, \cdot) - \lambda_i \cdot \log \pi_{\theta_t}^i(\cdot | s)) - \log Z_{t+1, (i)}(s), \pi_*^i(\cdot | s) - \pi_{\theta_t}^i(\cdot | s) \right\rangle \\ &= \langle \log \pi_{t+1}^i(\cdot | s), \pi_*^i(\cdot | s) - \pi_{\theta_t}^i(\cdot | s) \rangle, \end{aligned} \quad (\text{G.2})$$

and

$$\begin{aligned} & \left\langle \log \left[ \frac{\pi_{\theta_{t+1}}^i(\cdot | s)}{\pi_{\theta_t}^i(\cdot | s)} \right], \pi_{\theta_t}^i(\cdot | s) - \pi_{\theta_{t+1}}^i(\cdot | s) \right\rangle \\ &= \langle \mathcal{E}_{\theta_{t+1}, (i)}(s, \cdot) - \mathcal{E}_{\theta_t, (i)}(s, \cdot), \pi_{\theta_t}^i(\cdot | s) - \pi_{\theta_{t+1}}^i(\cdot | s) \rangle \\ &\quad - \langle \log Z_{\theta_{t+1}, (i)}(s), \pi_{\theta_t}^i(\cdot | s) - \pi_{\theta_{t+1}}^i(\cdot | s) \rangle + \langle \log Z_{\theta_t, (i)}(s), \pi_{\theta_t}^i(\cdot | s) - \pi_{\theta_{t+1}}^i(\cdot | s) \rangle \\ &= \langle \mathcal{E}_{\theta_{t+1}, (i)}(s, \cdot) - \mathcal{E}_{\theta_t, (i)}(s, \cdot), \pi_{\theta_t}^i(\cdot | s) - \pi_{\theta_{t+1}}^i(\cdot | s) \rangle. \end{aligned} \quad (\text{G.3})$$

Plugging (G.2) and (G.3) into (G.1), we obtain

$$\begin{aligned} & \text{KL}(\pi_*^i(\cdot | s) \| \pi_{\theta_t}^i(\cdot | s)) - \text{KL}(\pi_*^i(\cdot | s) \| \pi_{\theta_{t+1}}^i(\cdot | s)) \\ &= \left\langle \log \left[ \frac{\pi_{\theta_{t+1}}^i(\cdot | s)}{\pi_{\theta_t}^i(\cdot | s)} \right], \pi_*^i(\cdot | s) - \pi_{\theta_t}^i(\cdot | s) \right\rangle + \langle \mathcal{E}_{\theta_{t+1}, (i)}(s, \cdot) - \mathcal{E}_{\theta_t, (i)}(s, \cdot), \pi_{\theta_t}^i(\cdot | s) - \pi_{\theta_{t+1}}^i(\cdot | s) \rangle \\ &\quad + \alpha_{t, (i)} \cdot \langle \tilde{Q}_{(i)}^{\pi_{\theta_t}^i, \pi_{\theta_t}^{-i}}(s, \cdot) - \lambda_i \cdot \log \pi_{\theta_t}^i(\cdot | s), \pi_*^i(\cdot | s) - \pi_{\theta_t}^i(\cdot | s) \rangle + \text{KL}(\pi_{\theta_{t+1}}^i(\cdot | s) \| \pi_{\theta_t}^i(\cdot | s)) \\ &\geq \left\langle \log \left[ \frac{\pi_{\theta_{t+1}}^i(\cdot | s)}{\pi_{\theta_t}^i(\cdot | s)} \right], \pi_*^i(\cdot | s) - \pi_{\theta_t}^i(\cdot | s) \right\rangle - \|\mathcal{E}_{\theta_{t+1}, (i)}(s, \cdot) - \mathcal{E}_{\theta_t, (i)}(s, \cdot)\|_\infty \cdot \|\pi_{\theta_t}^i(\cdot | s) - \pi_{\theta_{t+1}}^i(\cdot | s)\|_1 \\ &\quad + \alpha_{t, (i)} \cdot \langle \tilde{Q}_{(i)}^{\pi_{\theta_t}^i, \pi_{\theta_t}^{-i}}(s, \cdot) - \lambda_i \cdot \log \pi_{\theta_t}^i(\cdot | s), \pi_*^i(\cdot | s) - \pi_{\theta_t}^i(\cdot | s) \rangle + 1/2 \cdot \|\pi_{\theta_{t+1}}^i(\cdot | s) - \pi_{\theta_t}^i(\cdot | s)\|_1^2, \end{aligned}$$

where in the last inequality we use the Cauchy-Schwartz inequality and the Pinsker's inequality. Rearranging the terms in (G.4), we finish the proof of Lemma C.4.  $\square$

## H PROOF OF LEMMA B.2

*Proof.* We prove the lemma by induction. First, since  $|\hat{Q}_{(i)}^{\pi_{\theta_0}^i, \pi_{\theta_0}^{-i}}(s, a^i)| \leq Q_{(i)}^{\max}$ , we have

$$\begin{aligned} |\hat{\mathcal{E}}_{1, (i)}(s, a^i)| &= |(1 - \lambda_i \alpha_{0, (i)}) \cdot \mathcal{E}_{\theta_0, (i)}(s, a^i) + \alpha_{0, (i)} \cdot \hat{Q}_{(i)}^{\pi_{\theta_0}^i, \pi_{\theta_0}^{-i}}(s, a^i)| \\ &= \alpha_{0, (i)} \cdot |\hat{Q}_{(i)}^{\pi_{\theta_0}^i, \pi_{\theta_0}^{-i}}(s, a^i)| \leq Q_{(i)}^{\max} / (\lambda_i - M_i), \end{aligned}$$

where the last inequality follows from  $\alpha_{0, (i)} = 1/(\lambda_i - M_i)$ . This means that setting  $|\mathcal{E}_{\theta_1, (i)}(s, a^i)| \leq Q_{(i)}^{\max} / (\lambda_i - M_i)$  covers the range of  $\hat{\mathcal{E}}_{1, (i)}(s, a^i)$ .

Now suppose that  $|\hat{\mathcal{E}}_{t, (i)}(s, a^i)| \leq Q_{(i)}^{\max} / (\lambda_i - M_i)$ . By  $\lambda_i \geq 2M_i$ , we have for all  $t \geq 1$  that,

$$\lambda_i \alpha_{t, (i)} = \frac{\lambda_i}{(t+1) \cdot (\lambda_i - M_i)} \leq \frac{\lambda_i}{2(\lambda_i - M_i)} \leq 1.$$

Thus, we have that, for all  $t \geq 1$  and  $(s, a^i) \in \mathcal{S} \times \mathcal{A}^i$ ,

$$\begin{aligned}
|\widehat{\mathcal{E}}_{t+1,(i)}(s, a^i)| &= |(1 - \lambda_i \alpha_{t,(i)}) \cdot \mathcal{E}_{\theta_{t,(i)}}(s, a^i) + \alpha_{t,(i)} \cdot \widehat{Q}_{(i)}^{\pi_{\theta_t}^i, \pi_{\theta_t}^{-i}}(s, a^i)| \\
&\leq \left(1 - \frac{\lambda_i}{(t+1) \cdot (\lambda_i - M_i)}\right) \cdot |\mathcal{E}_{\theta_{t,(i)}}(s, a^i)| + \frac{1}{(t+1) \cdot (\lambda_i - M_i)} \cdot |\widehat{Q}_{(i)}^{\pi_{\theta_t}^i, \pi_{\theta_t}^{-i}}(s, a^i)| \\
&\leq \frac{t \cdot (\lambda_i - M_i) - M_i}{(t+1) \cdot (\lambda_i - M_i)} \cdot \frac{Q_{(i)}^{\max}}{\lambda_i - M_i} + \frac{Q_{(i)}^{\max}}{(t+1) \cdot (\lambda_i - M_i)} \\
&\leq \frac{t}{t+1} \cdot \frac{Q_{(i)}^{\max}}{\lambda_i - M_i} + \frac{Q_{(i)}^{\max}}{(t+1) \cdot (\lambda_i - M_i)} = \frac{Q_{(i)}^{\max}}{\lambda_i - M_i},
\end{aligned}$$

which means that setting  $|\mathcal{E}_{\theta_{t+1,(i)}}(s, a^i)| \leq Q_{(i)}^{\max}/(\lambda_i - M_i)$  covers the range of  $\widehat{\mathcal{E}}_{t+1,(i)}(s, a^i)$ . By induction, we conclude the proof of Lemma B.2.  $\square$

## I IMBALANCED INFLUENCE

When the two players have imbalanced influence to the game (without loss of generality, we assume Player 2 has a dominant influence to the game), we let  $\iota_1/\iota_2 = z$ . In this case, we can replace (C.6) by

$$\begin{aligned}
(\text{II}) &\leq \sqrt{2z} \cdot \iota_2 \cdot \left\{ \mathbb{E}_{\nu^*} [\text{KL}_{t,(i)}^{1/2}(s) \cdot \text{KL}_{t,(i)}^{1/2}(s)] \right. \\
&\quad \left. + \frac{V_{(i)}^{\max} + Q_{(i)}^{\max} \cdot \zeta}{1 - \gamma} \cdot \mathbb{E}_{\nu^*} [\text{KL}_{t,(i)}(s)]^{1/2} \cdot \mathbb{E}_{\nu^*} [\text{KL}_{t,(-i)}(s)]^{1/2} \right\} \\
&\leq \sqrt{2z} \cdot \left( 1 + \frac{V_{(i)}^{\max} + Q_{(i)}^{\max} \cdot \zeta}{1 - \gamma} \right) \cdot \left( \iota_2 \cdot \mathbb{E}_{\nu^*} [\text{KL}_{t,(i)}(s)] + \iota_2 \cdot \mathbb{E}_{\nu^*} [\text{KL}_{t,(-i)}(s)] \right).
\end{aligned}$$

As a consequence, with  $M_i$  in (4.14) replaced by

$$M_i = \sqrt{2z} \cdot [2 + \sum_{i \in \{1,2\}} (V_{(i)}^{\max} + Q_{(i)}^{\max} \cdot \zeta)/(1 - \gamma)] \cdot \iota_2, \quad i \in \{1, 2\},$$

the convergence guarantee established in Theorem 4.5 remains valid. Taking  $\lambda_1 = \lambda_2 = x \cdot \iota_2 \sqrt{2z}$  into  $\lambda_i \geq 2M_i$ , we obtain

$$x \geq 2 + \sum_{i \in \{1,2\}} (V_{(i)}^{\max} + Q_{(i)}^{\max} \cdot \zeta)/(1 - \gamma).$$

For the above inequality to hold, we have a sufficient requirement for the ratio  $z$  as

$$z \leq (1 - \gamma)^4 / \left[ 16(1 + \gamma) \iota_2 \cdot \log(|\mathcal{A}^1| \cdot |\mathcal{A}^2|) \right]^2.$$

## J STRONGER ASSUMPTION: HANNAN CONSISTENCY

In the proof of Theorem 4.5 in Appendix C, we replace  $\pi_{\theta_t}^2$  and  $\pi_*^2$  with  $\widetilde{\pi}_t^2$ . Also, we replace  $\pi_*^1$  with

$$\pi_{\dagger}^1 = \operatorname{argmax}_{\pi^1} \left\{ \frac{1}{T} \cdot \sum_{t=0}^{T-1} \mathcal{J}(\pi^1, \widetilde{\pi}_t^2) \right\}.$$

With stronger assumptions stated in 4.2, corresponding to (C.8), we have

$$\begin{aligned}
&(1 - \gamma) \alpha_{t,(1)} \cdot [\mathcal{J}_{(1)}(\pi_{\dagger}^1, \widetilde{\pi}_t^2) - \mathcal{J}_{(1)}(\pi_{\theta_t}^1, \widetilde{\pi}_t^2)] \\
&\leq \mathbb{E}_{\nu^*} [\text{KL}_{t+1,(1)}^{\dagger}(s)] - \left\{ 1 - \left\{ \lambda_1 - \left[ 1 + \frac{V_{(1)}^{\max} + Q_{(1)}^{\max} \cdot \zeta}{1 - \gamma} \right] \cdot \iota_1 \right\} \cdot \alpha_{t,(1)} \right\} \cdot \mathbb{E}_{\nu^*} [\text{KL}_{t,(1)}^{\dagger}(s)] \\
&\quad (\epsilon_t + \epsilon'_t) + [2 + 2\lambda_1^2/(\lambda_1 - M_1)^2] \cdot (Q_{(1)}^{\max})^2 \cdot \alpha_{t,(1)}^2,
\end{aligned} \tag{J.1}$$

where  $\text{KL}_{t+1,(1)}^{\dagger}(s) = \text{KL}(\pi_{\dagger}^1(\cdot | s) \| \pi_{\theta_t}^1(\cdot | s))$ . Here we drop the KL-divergence term for Player 2 since  $\pi_*^2$  and  $\pi_{\theta_t}^2$  are replaced by the same policy  $\widetilde{\pi}_t^2$ . Also, the regularization parameter  $\lambda_2$  is dropped since now Player 2 no longer uses such a regularization parameter to update its policies. Multiplying

both sides of (J.2) and setting the stepsize  $\alpha_{t,(1)}$  as the stepsize choice in Theorem 4.5, we obtain

$$\begin{aligned} & \frac{1-\gamma}{(\lambda_1 - M_1)} \cdot [\mathcal{J}_{(1)}(\pi_{\dagger}^1, \tilde{\pi}_t^2) - \mathcal{J}_{(1)}(\pi_{\theta_t}^1, \tilde{\pi}_t^2)] \\ & \leq t \cdot \mathbb{E}_{\nu^*} [\text{KL}_{t,(1)}^{\dagger}(s)] - (t+1) \cdot \mathbb{E}_{\nu^*} [\text{KL}_{t+1,(1)}^{\dagger}(s)] \\ & \quad + (t+1) \cdot (\epsilon_t + \epsilon'_t) + \frac{[2 + 2\lambda_1^2/(\lambda_1 - M_1)^2] \cdot (Q_{(1)}^{\max})^2}{(t+1) \cdot (\lambda_1 - M_1)}, \end{aligned} \quad (\text{J.2})$$

applying same argument in the proof of Theorem 4.5, we obtain

$$\begin{aligned} & \sup_{\pi^1} \left\{ \frac{1}{T} \cdot \sum_{t=0}^{T-1} [\mathcal{J}(\pi^1, \tilde{\pi}_t^2) - \mathcal{J}(\pi_{\theta_t}^1, \tilde{\pi}_t^2)] \right\} \\ & = \frac{1}{T} \cdot \sum_{t=0}^{T-1} [\mathcal{J}(\pi_{\dagger}^1, \tilde{\pi}_t^2) - \mathcal{J}(\pi_{\theta_t}^1, \tilde{\pi}_t^2)] \\ & \leq \frac{\sigma \cdot (\lambda_1 - M_1)}{(1-\gamma) \cdot T} + \frac{[2 + 2\lambda_1^2/(\lambda_1 - M_1)^2] \cdot (Q_{(1)}^{\max})^2}{(1-\gamma) \cdot (\lambda_1 - M_1)} \cdot \frac{\log T}{T} + \lambda_1 \cdot \log |\mathcal{A}^1|. \end{aligned}$$

Thus, we conclude the proof of (4.17). Using the same argument as above, we can also prove the same result for Player 2 when Player 1 does not update its policies according to Algorithm 1. Setting  $\tilde{\pi}_t^1 = \pi_{\dagger}^1 = \pi_*^1$  and  $\tilde{\pi}_t^2 = \pi_{\dagger}^2 = \pi_*^2$ , and combining such result for both players, we can replace the left-hand side of the convergence guarantee established in Theorem 4.5 by (4.18). Thus, the proposed Algorithm 1 is Hannan consistent.
